# Supplementary material for: Boosting emission efficiency and suppressing device-efficiency roll-off for TADF emitters by modulating molecular conformation and intra–intermolecular interactions
Source: Royal Society of Chemistry journal article supplement (doi:10.1039/d3tc01375h), 2023-01-01
Supplement: d3tc01375h1.pdf [file d3tc01375h1.pdf]

**Boosting emission efficiency and suppressing device-efficiency roll-off  
for TADF emitters by modulating molecular conformation and intra-  
/intermolecular interactions**

Dan Lei,<sup>a,b,c,d</sup> Jin-Hui Song,<sup>a,c</sup> Ze-Ling Wu,<sup>a,c</sup> Jia-Xuan Hu,<sup>a,c</sup> Ya-Shu Wang,<sup>a,b,c</sup>

Dong-Hai Zhang,<sup>a,c</sup> Lingyi Meng,<sup>a,c</sup> Xu-Lin Chen<sup>\*a,c,d</sup> and Can-Zhong Lu<sup>\*a,b,c,d</sup>

**Content**

|                                                 |     |
|-------------------------------------------------|-----|
| 1. General Methods.....                         | S2  |
| 2. Material Synthesis and Characterization..... | S3  |
| 3. Theoretical Calculations.....                | S5  |
| 4. Thermal and electrical properties.....       | S17 |
| 5. Photophysical Properties.....                | S18 |
| 6. Device Fabrication and Characterization..... | S23 |
| 7. Structural characteristics.....              | S25 |
| 8. NMR Spectra.....                             | S33 |
| 9. Mass Spectra.....                            | S36 |
| 10. References.....                             | S36 |

## 1. General Methods

All reactions were taken under an N<sub>2</sub> atmosphere using standard Schlenk techniques. All reagents and solvents were obtained commercially and used without further purification. Dry tetrahydrofuran, dry toluene, dry 1,4-dioxane and dry dichloromethane (DCM) were purchased from Adamas Reagent, Ltd. All compounds were purified by column chromatography and dried, the prepared TADF material is further purified by sublimation before device fabrication. Single crystal X-ray diffraction data were collected at 200 K on a Bruker–D8 VENTRUE diffractometer with X-ray source of Mo K $\alpha$ . NMR (500 MHz) spectra were recorded on a Bruker Avance III NMR spectrometer, in deuterated chloroform (CDCl<sub>3</sub>). Thermogravimetric analyses (TGA) were performed on a METTLER TOLEDO system with a heating rate of 10 °C/min under nitrogen. UV-Vis absorption spectra were recorded with a Agilent Cary 5000 UV-Vis spectrophotometer under ambient condition. The absolute PLQYs were measured on an Edinburgh FLS1000 spectrophotometer equipped with an integrating sphere. Steady-state PL spectra were measured on an Edinburgh FLS980 using a Xenon lamp as an excitation light source. The transient PL decay curves were measured on the same spectrophotometer (FLS980) in time-correlated single-photon counting (TCSPC) mode with a NT242-1K OPO laser as an excitation light source. The time-resolved PL spectra were recorded on an Edinburgh LP980 spectrophotometer with a NT242-1K OPO laser excitation source.

## 2. Material Synthesis and Characterization

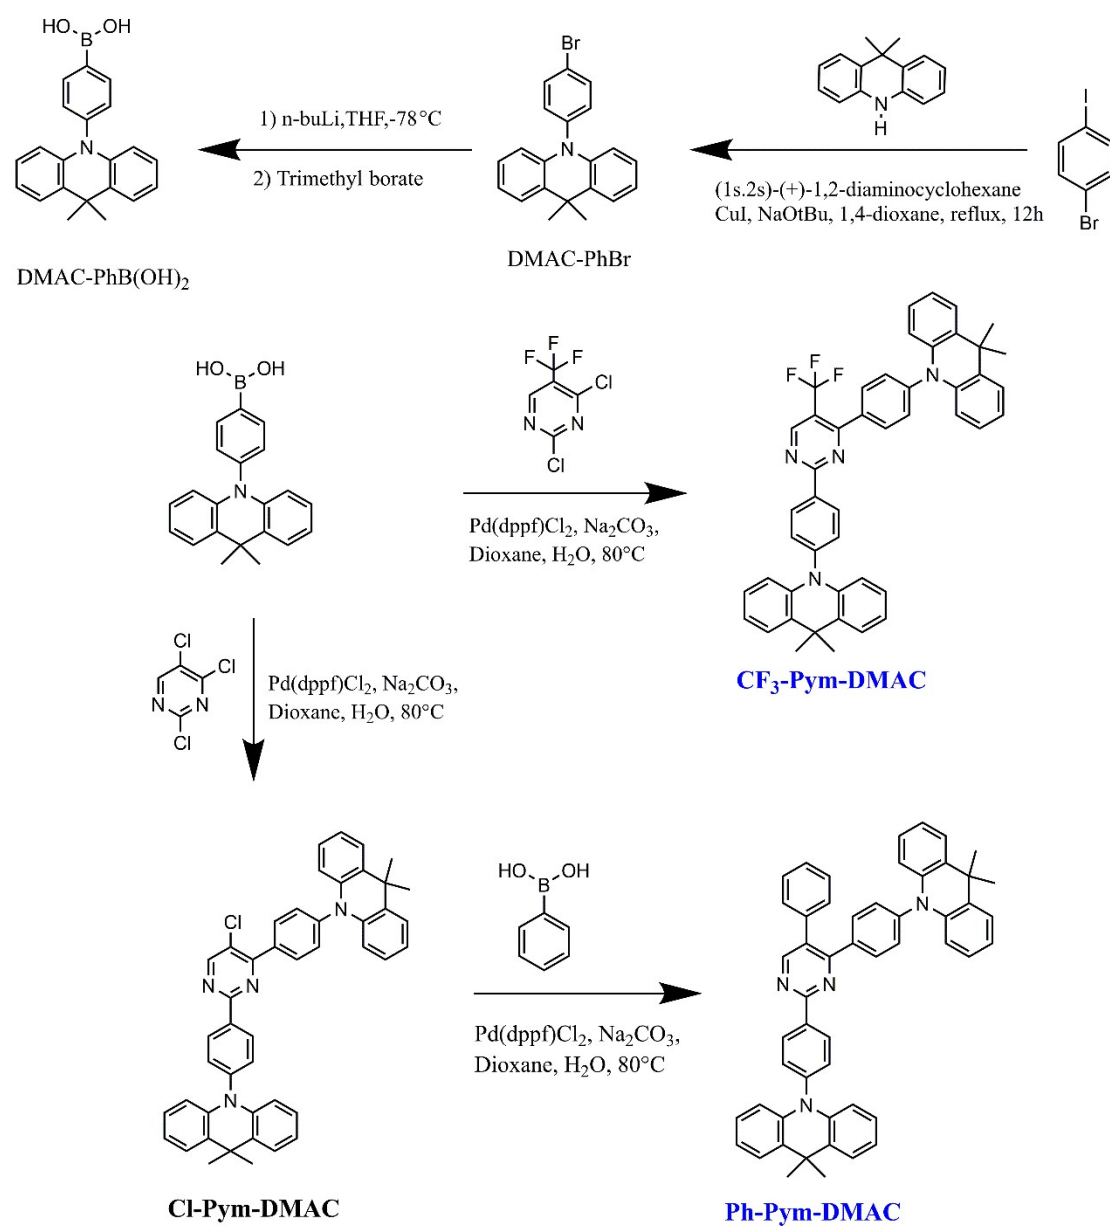

**Scheme S1.** Synthetic route of CF<sub>3</sub>-Pym-DMAC and Ph-Pym-DMAC.

### 1.1 Synthesis of DMAC-PhBr

The synthesis process of DMAC-PhBr was referred to the reported literature.<sup>1</sup>

### 1.2 Synthesis of DMAC-PhB(OH)<sub>2</sub>

The synthesis process was referred to the reported literature.<sup>2</sup>

### 1.3 Synthesis of CF<sub>3</sub>-Pym-DMAC

DMAC-PhB(OH)<sub>2</sub> (1.78 g, 5.4 mmol), 2,4-Dichloro-5-(trifluoromethyl)pyrimidine (542 mg, 2.5 mmol), Pd(dppf)Cl<sub>2</sub> (220 mg, 0.27 mmol) and base Na<sub>2</sub>CO<sub>3</sub> (1.14 g, 10.8

mmol) were suspended in 1,4-dioxane/water (28 : 4 mL). The mixture was stirred at 80 °C under an argon atmosphere for or a period time (usually 2-6 h) until the completion of the reaction as monitored by TLC. The cooled mixture was diluted with water and exhaustively extracted with ethyl acetate (30 mL, three times). The organic phase was washed by brine, dried over anhydrous Na<sub>2</sub>SO<sub>4</sub>, and evaporated under reduced pressure. The deposit was purified by silica-gel column chromatography using ethyl acetate/petroleum ether (10:1) as the eluent to obtain the products. Yellowish green solid, yield: 94%. <sup>1</sup>H NMR (500 MHz, CDCl<sub>3</sub>) δ 9.24 (s, 1H), 8.87 (d, J = 8.5 Hz, 2H), 8.01 (d, J = 8.3 Hz, 2H), 7.61 – 7.36 (m, 8H), 7.09 – 6.73 (m, 8H), 6.37 (ddd, J = 7.8, 3.4, 1.3 Hz, 4H), 1.72 (s, 12H). <sup>13</sup>C NMR (126 MHz, CDCl<sub>3</sub>) δ 165.85 (s), 165.17 (s), 156.41 (s), 144.98 (s), 143.41 (s), 140.58 (d, J = 9.1 Hz), 136.79 (s), 135.85 (s), 131.85 – 131.38 (m), 131.27 (s), 130.34 (s), 126.42 (d, J = 6.3 Hz), 125.30 (d, J = 8.6 Hz), 120.90 (d, J = 3.9 Hz), 114.18 (d, J = 3.2 Hz), 77.26 (s), 77.01 (s), 76.75 (s), 36.04 (s), 31.17 (d, J = 15.9 Hz). Anal. Calcd for C<sub>47</sub>H<sub>37</sub>N<sub>4</sub>F<sub>3</sub>: C, 78.97; H, 5.22; N, 7.84. Found: C, 78.56; H, 5.28; N, 7.69. ESI-APCI: m/z calcd. for C<sub>47</sub>H<sub>37</sub>N<sub>4</sub>F<sub>3</sub> [M + H]<sup>+</sup>, 715.3043; found, 715.3050.

#### 1.4 Synthesis of Cl-Pym-DMAC

Synthesis processes for Cl-Pym-DMAC are the same as CF<sub>3</sub>-Pym-DMAC but replacement of the reactive material. Yellowish green solid, yield: 40%. <sup>1</sup>H NMR (500 MHz, CDCl<sub>3</sub>) δ 9.23 (s, 1H), 8.86 (d, J = 8.5 Hz, 2H), 8.01 (d, J = 8.3 Hz, 2H), 7.54 (d, J = 7.6 Hz, 4H), 7.50 – 7.47 (m, 4H), 7.00 (m, J = 8H), 6.39 – 6.35 (m, 4H), 1.71 (s, 12H).

#### 1.5 Synthesis of Ph-Pym-DMAC

Synthesis processes for Ph-Pym-DMAC was similar to CF<sub>3</sub>-Pym-DMAC but replacement of the reactive material. Yellow-white solid, yield: 72%. <sup>1</sup>H NMR (500 MHz, CDCl<sub>3</sub>) δ 8.94 (s, 1H), 8.88 (d, J = 8.5 Hz, 2H), 7.84 (d, J = 8.5 Hz, 2H), 7.54 (d, J = 8.5 Hz, 2H), 7.51 – 7.35 (m, 9H), 7.32 (d, J = 8.5 Hz, 2H), 7.04 – 6.89 (m, 8H), 6.42 (dd, J = 8.0, 1.2 Hz, 2H), 6.32 (dd, J = 8.1, 1.2 Hz, 2H), 1.70 (d, J = 20.0 Hz, 12H). <sup>13</sup>C NMR (126 MHz, CDCl<sub>3</sub>) δ 140.64 (d, J = 13.1 Hz), 132.53 (s), 131.36 (d, J = 19.9 Hz), 131.01 (d, J = 10.9 Hz), 130.24 (s), 129.38 (s), 128.91 (s), 128.40 (s), 126.36 (d, J = 8.4 Hz), 125.26 (d, J = 4.5 Hz), 120.76 (d, J = 5.2 Hz), 114.17 (d, J = 18.2 Hz), 77.26 (s), 77.01

(s), 76.75 (s), 36.02 (d, J = 5.0 Hz), 31.27 (s), 31.11 (s). Anal. Calcd for C<sub>52</sub>H<sub>42</sub>N<sub>4</sub>: C, 86.39; H, 5.86; N, 7.75. Found: C, 86.54; H, 5.66; N, 7.82. ESI-APCI: m/z calcd. for C<sub>52</sub>H<sub>42</sub>N<sub>4</sub> [M + H]<sup>+</sup>, 722.3482; found, 723.3502.

### 3. Theoretical Calculations

All calculations are performed using the Gaussian 09 package. The ground state geometry of the studied compounds is calculated by functional theory of PEB0/6-311G (d, p). Using the optimized ground state geometry, the front-line molecular orbital and excited state molecular configuration of the molecule were obtained by the calculation of time-density functional theory (TD-DFT). The spin-orbit couplings were calculated at PBE0/DKH by ORCA. Use the GaussView program to generate visualized geometrically optimized structures and front-line molecular orbitals, and Multiwfn 2.4 to aid in the analysis of molecular orbital components.

**Table S1.** Calculated energy levels of the excited states and the FMOs.

|                           | S <sub>1</sub> | T <sub>1</sub> | T <sub>2</sub> | T <sub>3</sub> | T <sub>4</sub> | ΔE <sub>ST</sub> | HOMO  | LUMO  |
|---------------------------|----------------|----------------|----------------|----------------|----------------|------------------|-------|-------|
|                           | [eV]           | [eV]           | [eV]           | [eV]           | [eV]           | [eV]             | [eV]  | [eV]  |
| Ph-Pym-DMAC               | 2.710          | 2.700          | 2.793          | 2.843          | 3.076          | 0.010            | -5.28 | -1.98 |
| CF <sub>3</sub> -Pym-DMAC | 2.455          | 2.446          | 2.708          | 2.938          | 2.947          | 0.009            | -5.25 | -2.32 |

**Table S2.** Calculated energy levels spin-orbit couplings.

|                           | SOC <sub>S1-T1</sub> | SOC <sub>S1-T2</sub> | SOC <sub>S1-T3</sub> | SOC <sub>S1-T4</sub> |
|---------------------------|----------------------|----------------------|----------------------|----------------------|
|                           | [cm <sup>-1</sup> ]  | [cm <sup>-1</sup> ]  | [cm <sup>-1</sup> ]  | [cm <sup>-1</sup> ]  |
| Ph-Pym-DMAC               | 0.48                 | 0.044                | 0.014                | 0.15                 |
| CF <sub>3</sub> -Pym-DMAC | 0.30                 | 0.044                | 0.600                | 0.82                 |

**Table S3.** Local excitation (LE) characters (in %) for the S<sub>1</sub> and T<sub>1-4</sub> states.

|                           | S <sub>1</sub> | T <sub>1</sub> | T <sub>2</sub> | T <sub>3</sub> | T <sub>4</sub> |
|---------------------------|----------------|----------------|----------------|----------------|----------------|
|                           | LE(%)          | LE(%)          | LE(%)          | LE(%)          | LE(%)          |
| Ph-Pym-DMAC               | 9.90           | 10.2           | 10.1           | 99.6           | 18.1           |
| CF <sub>3</sub> -Pym-DMAC | 9.67           | 9.89           | 9.36           | 9.37           | 99.1           |

**Table S4.** The lowest excited singlet ( $S_1$ ) and triplet ( $T_{1-4}$ ) energies, and transition configurations of Ph-Pym-DMAC and  $CF_3$ -Pym-DMAC calculated by TD-DFT at the PEB0/6-311G (d, p).

| compound         | state | E (eV) | Main configuration        |
|------------------|-------|--------|---------------------------|
| Ph-Pym-DMAC      | $S_1$ | 2.710  | H→L 0.845 H→L+1 0.128     |
|                  | $T_1$ | 2.700  | H→L 0.838 H→L+1 0.132     |
|                  | $T_2$ | 2.793  | H-1→L 0.864 H-1→L+1 0.106 |
|                  | $T_3$ | 2.843  | H-2→L 0.630 H-2→L+1 0.064 |
|                  | $T_4$ | 3.076  | H→L+1 0.742 H→L 0.121     |
| $CF_3$ -Pym-DMAC | $S_1$ | 2.455  | H→L 0.921 H→L+1 0.060     |
|                  | $T_1$ | 2.446  | H→L 0.917 H→L+1 0.063     |
|                  | $T_2$ | 2.708  | H-1→L 0.881 H-1→L+1 0.094 |
|                  | $T_3$ | 2.938  | H→L+1 0.889 H→L 0.063     |
|                  | $T_4$ | 2.947  | H-8→L 0.645 H-8→L+1 0.081 |

H → L represents the HOMO to LUMO transition. Excitation configurations with the highest contributions are presented, together with the corresponding transition symmetry and nature of the involved orbitals.

**Table S5.** Calculated XYZ coordinates of  $CF_3$ -Pym-DMAC at optimized  $S_0$  state.

| Atomic Type | Coordinates (Angstroms) |          |          | Atomic Type | Coordinates (Angstroms) |          |          |
|-------------|-------------------------|----------|----------|-------------|-------------------------|----------|----------|
|             | X                       | Y        | Z        |             | X                       | Y        | Z        |
| F           | -3.23655                | 4.332037 | 0.387347 | C           | -6.83124                | 0.762567 | 1.205919 |
| F           | -2.9337                 | 4.719113 | -1.7174  | C           | -6.72722                | -0.56102 | 0.767644 |
| F           | -2.02282                | 5.994849 | -0.24534 | C           | -6.77276                | -3.52649 | 1.850951 |
| N           | -5.56798                | -1.02493 | 0.122504 | C           | -1.09828                | 3.856933 | -0.49599 |
| N           | 0.081474                | 1.82148  | -0.22571 | C           | 0.142015                | 4.478651 | -0.60878 |
| N           | 6.107613                | -0.35637 | 0.116663 | C           | -2.32836                | 4.716617 | -0.51358 |
| N           | 1.292393                | 3.830617 | -0.54993 | C           | 3.704584                | 2.442535 | -0.27641 |
| C           | -8.88498                | -3.69875 | 0.545155 | C           | 4.896247                | 1.744049 | -0.16517 |

|   |          |          |          |   |          |          |          |
|---|----------|----------|----------|---|----------|----------|----------|
| C | -7.5737  | -2.92746 | 0.672123 | H | -9.50133 | -3.32119 | -0.27544 |
| C | -6.71238 | -3.04081 | -0.57667 | H | -9.46042 | -3.63501 | 1.471388 |
| C | -5.66208 | -2.12258 | -0.74951 | H | -8.69225 | -4.76061 | 0.376556 |
| C | -4.45816 | -0.13935 | -0.00971 | H | -3.39191 | -1.04557 | 1.607752 |
| C | -3.37364 | -0.26987 | 0.850388 | H | -1.42999 | 0.473975 | 1.387331 |
| C | -2.28584 | 0.581094 | 0.731188 | H | 1.524085 | -0.13849 | -0.01981 |
| C | -2.28047 | 1.593811 | -0.22965 | H | 3.672515 | -1.39579 | 0.183345 |
| C | -1.08318 | 2.460399 | -0.33162 | H | 7.75723  | -3.83543 | 0.579968 |
| C | 1.21555  | 2.512653 | -0.33649 | H | 9.268404 | -3.61455 | 1.475535 |
| C | 2.483686 | 1.765531 | -0.22047 | H | 9.306248 | -3.83027 | -0.27728 |
| C | 2.47564  | 0.378261 | -0.05481 | H | 10.62335 | -1.64314 | -0.51831 |
| C | 3.668088 | -0.31873 | 0.056109 | H | 10.58595 | -1.42776 | 1.234572 |
| C | 4.881918 | 0.361736 | 0.002131 | H | 9.979264 | -0.14647 | 0.17408  |
| C | 6.716676 | -0.85021 | -1.03977 | H | 9.409068 | -2.59096 | -2.10896 |
| C | 7.920317 | -1.56748 | -0.96421 | H | 8.35955  | -2.19806 | -4.29292 |
| C | 8.630084 | -1.84999 | 0.354566 | H | 6.218289 | -0.91843 | -4.40379 |
| C | 8.747572 | -3.37462 | 0.544667 | H | 5.192091 | -0.07394 | -2.34827 |
| C | 10.03979 | -1.22933 | 0.308465 | H | 5.088561 | 0.507288 | 2.398935 |
| C | 8.47821  | -2.03457 | -2.15391 | H | 6.02232  | 0.190987 | 4.639487 |
| C | 7.892567 | -1.81738 | -3.39153 | H | 8.160692 | -1.06447 | 4.932365 |
| C | 6.70237  | -1.10598 | -3.45104 | H | 9.300312 | -1.96798 | 2.954879 |
| C | 6.120663 | -0.62778 | -2.2903  | H | -5.28656 | 0.932742 | -1.67124 |
| C | 6.664156 | -0.55293 | 1.382958 | H | -3.36942 | 2.471437 | -1.87093 |
| C | 6.016245 | -0.0386  | 2.516203 | H | -3.91035 | -1.61761 | -1.896   |
| C | 6.545718 | -0.21848 | 3.781778 | H | -4.14678 | -3.49204 | -3.46074 |
| C | 7.734206 | -0.91596 | 3.946698 | H | -6.06611 | -5.06406 | -3.24207 |
| C | 8.371027 | -1.42259 | 2.824335 | H | -7.66017 | -4.77707 | -1.39725 |
| C | 7.866537 | -1.26036 | 1.534407 | H | -9.81246 | -1.623   | 1.668908 |
| C | -4.44556 | 0.848678 | -0.99142 | H | -10.0123 | 0.718082 | 2.380266 |

|   |          |          |          |   |          |          |          |
|---|----------|----------|----------|---|----------|----------|----------|
| C | -3.36815 | 1.714631 | -1.0967  | H | -8.06421 | 2.248804 | 2.123101 |
| C | -4.73636 | -2.30822 | -1.78061 | H | -5.99754 | 1.44196  | 1.079586 |
| C | -4.87461 | -3.36652 | -2.66592 | H | -7.34437 | -3.43652 | 2.779789 |
| C | -5.94138 | -4.24375 | -2.54394 | H | -5.82099 | -3.00662 | 1.984102 |
| C | -6.84347 | -4.07263 | -1.50093 | H | -6.56187 | -4.58411 | 1.665055 |
| C | -7.79632 | -1.45176 | 0.967268 | H | 0.197863 | 5.55526  | -0.73976 |
| C | -8.96962 | -0.95683 | 1.528092 | H | 3.699025 | 3.517871 | -0.40784 |
| C | -9.087   | 0.365603 | 1.938099 | H | 5.848995 | 2.2606   | -0.20616 |
| C | -8.00272 | 1.217339 | 1.792244 |   |          |          |          |

**Table S6:** Calculated XYZ coordinates of CF<sub>3</sub>-Pym-DMAC at optimized S<sub>1</sub> state.

| Atomic Type | Coordinates (Angstroms) |          |          | Atomic Type | Coordinates (Angstroms) |          |          |
|-------------|-------------------------|----------|----------|-------------|-------------------------|----------|----------|
|             | X                       | Y        | Z        |             | X                       | Y        | Z        |
| F           | -3.21636                | 4.36222  | 0.348072 | C           | -6.80761                | 0.750513 | 1.272967 |
| F           | -2.95732                | 4.737873 | -1.76067 | C           | -6.71883                | -0.5663  | 0.809255 |
| F           | -1.99391                | 6.014067 | -0.32296 | C           | -6.74127                | -3.54437 | 1.852362 |
| N           | -5.58184                | -1.01631 | 0.122108 | C           | -1.08972                | 3.868887 | -0.55507 |
| N           | 0.076493                | 1.816542 | -0.23255 | C           | 0.172633                | 4.475155 | -0.70272 |
| N           | 6.125803                | -0.37957 | 0.120421 | C           | -2.29425                | 4.721534 | -0.56628 |
| N           | 1.314098                | 3.842157 | -0.62856 | C           | 3.721422                | 2.423107 | -0.35843 |
| C           | -8.88839                | -3.69731 | 0.602849 | C           | 4.905957                | 1.729701 | -0.23972 |
| C           | -7.57348                | -2.92846 | 0.704282 | H           | -9.52618                | -3.30748 | -0.19542 |
| C           | -6.74622                | -3.02484 | -0.56853 | H           | -9.43861                | -3.64524 | 1.545176 |
| C           | -5.69959                | -2.10324 | -0.75428 | H           | -8.70155                | -4.75697 | 0.413753 |
| C           | -4.4638                 | -0.13487 | -0.01482 | H           | -3.37646                | -1.07386 | 1.57022  |
| C           | -3.3659                 | -0.28596 | 0.824558 | H           | -1.41329                | 0.44928  | 1.348291 |
| C           | -2.27853                | 0.565821 | 0.706322 | H           | 1.529559                | -0.142   | 0.074179 |
| C           | -2.27185                | 1.594958 | -0.23834 | H           | 3.65163                 | -1.39741 | 0.292941 |
| C           | -1.06672                | 2.455888 | -0.34902 | H           | 7.770663                | -3.83972 | 0.712208 |



|   |          |          |          |   |          |          |          |
|---|----------|----------|----------|---|----------|----------|----------|
| C | 1.239832 | 2.499364 | -0.36635 | H | 9.303107 | -3.57204 | 1.558296 |
| C | 2.468506 | 1.767965 | -0.24368 | H | 9.298895 | -3.87228 | -0.18181 |
| C | 2.480675 | 0.370025 | -0.00588 | H | 10.61382 | -1.7075  | -0.55952 |
| C | 3.662931 | -0.3265  | 0.113113 | H | 10.61914 | -1.4077  | 1.180563 |
| C | 4.880629 | 0.352302 | -0.00246 | H | 9.999308 | -0.17217 | 0.073704 |
| C | 6.696865 | -0.9223  | -1.00997 | H | 9.355662 | -2.72339 | -2.0904  |
| C | 7.911116 | -1.64592 | -0.93633 | H | 8.220546 | -2.40844 | -4.23692 |
| C | 8.643352 | -1.86327 | 0.369154 | H | 6.084464 | -1.13147 | -4.34591 |
| C | 8.758973 | -3.38172 | 0.630813 | H | 5.121296 | -0.18767 | -2.27946 |
| C | 10.05609 | -1.24721 | 0.258759 | H | 5.134171 | 0.6053   | 2.322671 |
| C | 8.42716  | -2.16457 | -2.11723 | H | 6.109999 | 0.408028 | 4.58079  |
| C | 7.787474 | -1.98868 | -3.3362  | H | 8.247224 | -0.83271 | 4.893891 |
| C | 6.590199 | -1.27312 | -3.39837 | H | 9.370629 | -1.84975 | 2.970617 |
| C | 6.047101 | -0.74434 | -2.25287 | H | -5.31349 | 0.980248 | -1.63664 |
| C | 6.70362  | -0.51305 | 1.364209 | H | -3.38928 | 2.510894 | -1.83448 |
| C | 6.060446 | 0.071251 | 2.479235 | H | -3.97845 | -1.58412 | -1.93513 |
| C | 6.610577 | -0.04336 | 3.732638 | H | -4.25562 | -3.43889 | -3.52146 |
| C | 7.808515 | -0.73896 | 3.907089 | H | -6.17168 | -5.01321 | -3.2768  |
| C | 8.441575 | -1.3136  | 2.813948 | H | -7.7174  | -4.74952 | -1.38671 |
| C | 7.918245 | -1.22038 | 1.530446 | H | -9.78193 | -1.63619 | 1.782095 |
| C | -4.46036 | 0.873078 | -0.97464 | H | -9.95614 | 0.694905 | 2.534437 |
| C | -3.37737 | 1.73356  | -1.08108 | H | -8.01001 | 2.22449  | 2.245939 |
| C | -4.79962 | -2.27879 | -1.81091 | H | -5.97476 | 1.427674 | 1.130869 |
| C | -4.96257 | -3.32465 | -2.706   | H | -7.28688 | -3.46591 | 2.798    |
| C | -6.02746 | -4.20314 | -2.57017 | H | -5.78616 | -3.02586 | 1.965041 |
| C | -6.90234 | -4.04468 | -1.50225 | H | -6.53633 | -4.59974 | 1.646325 |
| C | -7.78567 | -1.45693 | 1.026114 | H | 0.223627 | 5.546927 | -0.88066 |
| C | -8.9418  | -0.96923 | 1.627821 | H | 3.720031 | 3.490145 | -0.54387 |
| C | -9.0443  | 0.346773 | 2.061534 | H | 5.855508 | 2.248909 | -0.33031 |

|   |          |          |        |  |  |  |  |
|---|----------|----------|--------|--|--|--|--|
| C | -7.96103 | 1.197712 | 1.8984 |  |  |  |  |
|---|----------|----------|--------|--|--|--|--|

**Table S7:** Calculated XYZ coordinates of CF<sub>3</sub>-Pym-DMAC at optimized T<sub>1</sub> state.

| Atomic Type | Coordinates (Angstroms) |          |          | Atomic Type | Coordinates (Angstroms) |          |          |
|-------------|-------------------------|----------|----------|-------------|-------------------------|----------|----------|
|             | X                       | Y        | X        |             | X                       | Y        | X        |
| F           | -3.20127                | 4.361537 | 0.071412 | C           | -6.79133                | 0.8748   | 1.241035 |
| F           | -2.94877                | 4.59962  | -2.05861 | C           | -6.71759                | -0.47406 | 0.878059 |
| F           | -1.98357                | 5.966553 | -0.70816 | C           | -6.76324                | -3.36676 | 2.139676 |
| N           | -5.58812                | -0.98663 | 0.221789 | C           | -1.0794                 | 3.810814 | -0.80886 |
| N           | 0.084827                | 1.782001 | -0.3657  | C           | 0.18135                 | 4.408378 | -0.99903 |
| N           | 6.125561                | -0.38536 | 0.107557 | C           | -2.28754                | 4.66329  | -0.86889 |
| N           | 1.322132                | 3.778064 | -0.89287 | C           | 3.731742                | 2.383695 | -0.54416 |
| C           | -8.91891                | -3.58931 | 0.915555 | C           | 4.911677                | 1.700925 | -0.37536 |
| C           | -7.59572                | -2.82876 | 0.953289 | H           | -9.5572                 | -3.2533  | 0.09359  |
| C           | -6.77688                | -3.02764 | -0.31296 | H           | -9.46326                | -3.46159 | 1.854025 |
| C           | -5.72184                | -2.13398 | -0.57226 | H           | -8.74389                | -4.662   | 0.805035 |
| C           | -4.46438                | -0.12774 | 0.014    | H           | -3.38209                | -0.94576 | 1.667796 |
| C           | -3.36731                | -0.21867 | 0.862924 | H           | -1.41099                | 0.544996 | 1.328667 |
| C           | -2.27542                | 0.615676 | 0.678911 | H           | 1.533042                | -0.15204 | 0.066343 |
| C           | -2.2659                 | 1.567887 | -0.34261 | H           | 3.654905                | -1.394   | 0.344581 |
| C           | -1.05826                | 2.414689 | -0.51723 | H           | 7.826791                | -3.55028 | 1.565735 |
| C           | 1.249012                | 2.455421 | -0.54762 | H           | 9.481718                | -3.11968 | 2.024875 |
| C           | 2.474545                | 1.734785 | -0.38412 | H           | 9.182774                | -3.97343 | 0.508319 |
| C           | 2.484892                | 0.349331 | -0.05784 | H           | 10.44025                | -2.13802 | -0.76274 |
| C           | 3.664448                | -0.33799 | 0.091739 | H           | 10.72978                | -1.27876 | 0.752314 |
| C           | 4.891422                | 0.331931 | -0.0591  | H           | 9.944513                | -0.44613 | -0.59897 |
| C           | 6.523454                | -1.28014 | -0.87017 | H           | 8.936227                | -3.52535 | -1.64849 |
| C           | 7.711773                | -2.0313  | -0.7285  | H           | 7.515068                | -3.81251 | -3.62296 |
| C           | 8.645607                | -1.85739 | 0.450419 | H           | 5.462366                | -2.4245  | -3.89013 |

|   |          |          |          |   |          |          |          |
|---|----------|----------|----------|---|----------|----------|----------|
| C | 8.791421 | -3.20892 | 1.18318  | H | 4.85189  | -0.80205 | -2.14083 |
| C | 10.02465 | -1.40021 | -0.07295 | H | 5.436001 | 1.18204  | 2.087121 |
| C | 8.031478 | -2.9343  | -1.73579 | H | 6.768951 | 1.672293 | 4.099172 |
| C | 7.2325   | -3.09761 | -2.8586  | H | 8.981679 | 0.56885  | 4.41195  |
| C | 6.081242 | -2.32528 | -3.00618 | H | 9.797701 | -1.02803 | 2.74307  |
| C | 5.731443 | -1.42042 | -2.03083 | H | -5.30877 | 0.859965 | -1.69111 |
| C | 6.887249 | -0.16558 | 1.24192  | H | -3.37661 | 2.361187 | -2.00802 |
| C | 6.403523 | 0.721552 | 2.228266 | H | -4.00172 | -1.72318 | -1.79732 |
| C | 7.151432 | 0.987019 | 3.351937 | H | -4.30816 | -3.68691 | -3.23981 |
| C | 8.386752 | 0.365466 | 3.528836 | H | -6.23923 | -5.21733 | -2.86916 |
| C | 8.84651  | -0.53456 | 2.57796  | H | -7.77067 | -4.79753 | -0.99609 |
| C | 8.120795 | -0.8285  | 1.429319 | H | -9.78513 | -1.43724 | 1.942735 |
| C | -4.45603 | 0.801178 | -1.0227  | H | -9.93281 | 0.945202 | 2.518752 |
| C | -3.36901 | 1.645418 | -1.19574 | H | -7.97443 | 2.429723 | 2.106084 |
| C | -4.83    | -2.39696 | -1.6174  | H | -5.95331 | 1.531697 | 1.044467 |
| C | -5.00915 | -3.50455 | -2.43167 | H | -7.30296 | -3.2136  | 3.079479 |
| C | -6.08239 | -4.35867 | -2.22546 | H | -5.80244 | -2.8513  | 2.20967  |
| C | -6.94914 | -4.11198 | -1.16772 | H | -6.56978 | -4.4364  | 2.0109   |
| C | -7.79146 | -1.33533 | 1.166017 | H | 0.232223 | 5.467163 | -1.24176 |
| C | -8.93949 | -0.79222 | 1.734849 | H | 3.729741 | 3.434287 | -0.80658 |
| C | -9.02703 | 0.553616 | 2.06882  | H | 5.862278 | 2.209458 | -0.50583 |
| C | -7.93696 | 1.37929  | 1.836672 |   |          |          |          |

**Table S8:** Calculated XYZ coordinates of Ph-Pym-DMAC at optimized  $S_0$  state.

| Atomic Type | Coordinates (Angstroms) |          |          | Atomic Type | Coordinates (Angstroms) |          |          |
|-------------|-------------------------|----------|----------|-------------|-------------------------|----------|----------|
|             | X                       | Y        | X        |             | X                       | Y        | X        |
| N           | -5.43554                | -1.28568 | 0.05234  | C           | -4.37628                | -3.79244 | -2.44551 |
| N           | 0.187987                | 1.658159 | -0.20353 | C           | -5.42582                | -4.69909 | -2.39294 |
| N           | 6.286015                | -0.33355 | 0.119605 | C           | -6.47397                | -4.45552 | -1.519   |

|   |          |          |          |   |          |          |          |
|---|----------|----------|----------|---|----------|----------|----------|
| N | 1.333729 | 3.689278 | -0.59725 | C | -7.79465 | -4.34812 | 1.20046  |
| C | -8.52009 | -0.38512 | 2.755036 | C | 2.630837 | 0.28751  | -0.03384 |
| C | -7.42679 | 0.460202 | 2.627191 | C | 3.845216 | -0.37084 | 0.079755 |
| C | -6.41492 | 0.15649  | 1.733773 | C | 10.24716 | -1.09104 | 0.295772 |
| C | -6.47156 | -1.00279 | 0.945135 | H | -9.32013 | -0.15997 | 3.451274 |
| C | -4.33241 | -0.38739 | -0.0377  | H | -7.35507 | 1.363278 | 3.2245   |
| C | -4.36490 | 0.669432 | -0.94226 | H | -5.56661 | 0.82278  | 1.640509 |
| C | -3.29726 | 1.551111 | -1.02285 | H | -5.23274 | 0.792061 | -1.58098 |
| C | -2.17468 | 1.379229 | -0.20985 | H | -3.33295 | 2.368784 | -1.73329 |
| C | -0.99292 | 2.269481 | -0.30776 | H | 3.751608 | 3.454128 | -0.45605 |
| C | 1.299358 | 2.376985 | -0.34528 | H | 5.942097 | 2.268666 | -0.24918 |
| C | 2.592827 | 1.670597 | -0.22547 | H | 9.639256 | -2.50245 | -2.09426 |
| C | 3.792303 | 2.382149 | -0.30433 | H | 8.563144 | -2.17678 | -4.27656 |
| C | 5.006416 | 1.723168 | -0.19032 | H | 9.546237 | -3.47496 | 1.508916 |
| C | 5.037019 | 0.344761 | 0.002677 | H | 9.577619 | -3.71952 | -0.24066 |
| C | 6.902198 | -0.82705 | -1.03253 | H | 8.035300 | -3.75021 | 0.628116 |
| C | 8.128007 | -1.50597 | -0.95512 | H | 5.260949 | 0.541659 | 2.392915 |
| C | 8.691683 | -1.97512 | -2.14128 | H | 6.22190  | 0.295597 | 4.631447 |
| C | 8.091091 | -1.79595 | -3.37783 | H | 8.39942  | -0.88997 | 4.929263 |
| C | 9.013088 | -3.26465 | 0.577789 | H | 9.549502 | -1.7959  | 2.958731 |
| C | 8.854432 | -1.74702 | 0.362831 | H | 5.345406 | -0.11947 | -2.34114 |
| C | 8.083664 | -1.15756 | 1.538067 | H | 6.38261  | -0.96513 | -4.39134 |
| C | 6.859067 | -0.48962 | 1.383561 | H | -1.87178 | 5.405715 | -2.39855 |
| C | 6.205475 | 0.026213 | 2.513085 | H | -3.8952  | 6.819922 | -2.38618 |
| C | 6.750483 | -0.11407 | 3.776967 | H | -5.49649 | 6.682108 | -0.49839 |
| C | 7.960763 | -0.77256 | 3.944698 | H | -5.04595 | 5.133216 | 1.384177 |
| C | 8.603331 | -1.28071 | 2.826307 | H | -3.02041 | 3.725836 | 1.374621 |
| C | 6.291011 | -0.6435  | -2.28226 | H | 0.186652 | 5.377983 | -0.81959 |
| C | 6.879085 | -1.12232 | -3.43942 | H | -3.19900 | -1.39833 | 1.471795 |

|   |          |          |          |   |          |          |          |
|---|----------|----------|----------|---|----------|----------|----------|
| C | -1.06820 | 3.660897 | -0.50641 | H | -1.25868 | 0.156409 | 1.290875 |
| C | -2.30771 | 4.465728 | -0.51452 | H | -9.42818 | -2.18927 | 2.074396 |
| C | -2.56424 | 5.351733 | -1.56403 | H | -8.95609 | -2.21506 | -1.28478 |
| C | -3.70642 | 6.143177 | -1.55945 | H | -9.87546 | -2.94316 | 0.04158  |
| C | -4.60445 | 6.064897 | -0.50282 | H | -9.13642 | -3.97354 | -1.18819 |
| C | -4.35312 | 5.192816 | 0.551428 | H | -3.56304 | -1.96968 | -1.68503 |
| C | -3.21545 | 4.399489 | 0.546797 | H | -3.54041 | -3.95375 | -3.11821 |
| C | 0.163028 | 4.301578 | -0.65894 | H | -5.43042 | -5.58279 | -3.02109 |
| C | -3.21612 | -0.56839 | 0.773685 | H | -7.2938  | -5.16572 | -1.47883 |
| C | -2.14096 | 0.301584 | 0.678272 | H | -7.91055 | -5.28261 | 0.644945 |
| C | -8.57265 | -1.52901 | 1.973562 | H | -8.64995 | -4.2525  | 1.87478  |
| C | -7.57135 | -1.86653 | 1.063547 | H | -6.88900 | -4.42303 | 1.807522 |
| C | -7.70807 | -3.14371 | 0.243206 | H | 1.695864 | -0.25737 | 0.018436 |
| C | -8.99682 | -3.06402 | -0.59778 | H | 3.883400 | -1.44483 | 0.226829 |
| C | -6.51791 | -3.33549 | -0.6892  | H | 10.15736 | -0.01257 | 0.143528 |
| C | -5.45005 | -2.42744 | -0.75328 | H | 10.83563 | -1.50359 | -0.52819 |
| C | -4.38712 | -2.67022 | -1.63631 | H | 10.80495 | -1.25928 | 1.22094  |

**Table S9:** Calculated XYZ coordinates of Ph-Pym-DMAC at optimized  $S_1$  state.

| Atomic Type | Coordinates (Angstroms) |          |          | Atomic Type | Coordinates (Angstroms) |          |          |
|-------------|-------------------------|----------|----------|-------------|-------------------------|----------|----------|
|             | X                       | Y        | X        |             | X                       | Y        | X        |
| N           | -5.43731                | -1.28756 | 0.076429 | C           | -4.36542                | -3.84044 | -2.36462 |
| N           | 0.17339                 | 1.658331 | -0.22895 | C           | -5.40654                | -4.75607 | -2.29    |
| N           | 6.28643                 | -0.35945 | 0.120972 | C           | -6.45487                | -4.50126 | -1.41934 |
| N           | 1.343781                | 3.667102 | -0.82063 | C           | -7.7739                 | -4.3418  | 1.298987 |
| C           | -8.52873                | -0.34706 | 2.758007 | C           | 2.620379                | 0.286033 | 0.042022 |
| C           | -7.44152                | 0.503195 | 2.606874 | C           | 3.822794                | -0.37015 | 0.179863 |
| C           | -6.42786                | 0.18554  | 1.721075 | C           | 10.24191                | -1.10087 | 0.207639 |
| C           | -6.47503                | -0.99375 | 0.960935 | H           | -9.33046                | -0.10994 | 3.448594 |

|   |          |          |          |   |          |          |          |
|---|----------|----------|----------|---|----------|----------|----------|
| C | -4.33279 | -0.38618 | -0.0278  | H | -7.37651 | 1.422857 | 3.179299 |
| C | -4.36488 | 0.659009 | -0.94466 | H | -5.58478 | 0.854869 | 1.606542 |
| C | -3.29775 | 1.541412 | -1.03512 | H | -5.23305 | 0.775535 | -1.58487 |
| C | -2.17083 | 1.387179 | -0.22143 | H | -3.33395 | 2.353536 | -1.75185 |
| C | -0.98733 | 2.27399  | -0.34307 | H | 3.759349 | 3.385373 | -0.77009 |
| C | 1.312111 | 2.351549 | -0.44547 | H | 5.933612 | 2.219286 | -0.52046 |
| C | 2.563357 | 1.661133 | -0.30197 | H | 9.522174 | -2.77814 | -1.99983 |
| C | 3.795585 | 2.336477 | -0.5024  | H | 8.318058 | -2.66239 | -4.12845 |
| C | 5.001    | 1.685026 | -0.3638  | H | 9.602134 | -3.34069 | 1.702265 |
| C | 5.019823 | 0.32863  | -0.02118 | H | 9.558929 | -3.77395 | -0.00891 |
| C | 6.842185 | -0.97309 | -0.98075 | H | 8.056112 | -3.71902 | 0.926112 |
| C | 8.078784 | -1.65517 | -0.88826 | H | 5.325865 | 0.762293 | 2.267936 |
| C | 8.576816 | -2.24922 | -2.04105 | H | 6.367147 | 0.765435 | 4.507198 |
| C | 7.89802  | -2.18614 | -3.24994 | H | 8.547989 | -0.3881  | 4.851074 |
| C | 9.026259 | -3.23878 | 0.780029 | H | 9.649617 | -1.51731 | 2.978716 |
| C | 8.853855 | -1.74937 | 0.407268 | H | 5.210537 | -0.3816  | -2.25283 |
| C | 8.140878 | -1.04082 | 1.537598 | H | 6.142634 | -1.4572  | -4.27053 |
| C | 6.901988 | -0.38198 | 1.353824 | H | -1.75386 | 5.648689 | -2.34011 |
| C | 6.271567 | 0.26794  | 2.439254 | H | -3.72111 | 7.115469 | -2.23834 |
| C | 6.858107 | 0.26463  | 3.681468 | H | -5.42931 | 6.80312  | -0.46066 |
| C | 8.080355 | -0.3822  | 3.873157 | H | -5.10525 | 5.014912 | 1.233438 |
| C | 8.700945 | -1.02101 | 2.808783 | H | -3.11572 | 3.579165 | 1.16139  |
| C | 6.152673 | -0.9097  | -2.21315 | H | 0.208822 | 5.32994  | -1.14735 |
| C | 6.67876  | -1.5109  | -3.33066 | H | -3.19947 | -1.37012 | 1.500475 |
| C | -1.06691 | 3.67164  | -0.63249 | H | -1.26471 | 0.193234 | 1.302271 |
| C | -2.27422 | 4.497199 | -0.5959  | H | -9.4235  | -2.17467 | 2.122814 |
| C | -2.47585 | 5.518983 | -1.53983 | H | -8.95377 | -2.27762 | -1.23373 |
| C | -3.59268 | 6.340505 | -1.48866 | H | -9.86666 | -2.98072 | 0.11046  |
| C | -4.55246 | 6.165515 | -0.49746 | H | -9.12079 | -4.03494 | -1.09599 |

|   |          |          |          |   |          |          |          |
|---|----------|----------|----------|---|----------|----------|----------|
| C | -4.37088 | 5.158688 | 0.446673 | H | -3.56856 | -1.991   | -1.64593 |
| C | -3.25186 | 4.342315 | 0.402737 | H | -3.5301  | -4.008   | -3.03689 |
| C | 0.182829 | 4.269645 | -0.89371 | H | -5.40537 | -5.6533  | -2.89905 |
| C | -3.21675 | -0.55164 | 0.78817  | H | -7.2694  | -5.21668 | -1.36155 |
| C | -2.14581 | 0.32199  | 0.684255 | H | -7.88272 | -5.2903  | 0.765746 |
| C | -8.57288 | -1.51041 | 2.005384 | H | -8.629   | -4.23639 | 1.97237  |
| C | -7.56931 | -1.86199 | 1.103019 | H | -6.86671 | -4.39436 | 1.906187 |
| C | -7.69732 | -3.15944 | 0.313694 | H | 1.685621 | -0.24165 | 0.187577 |
| C | -8.98782 | -3.11057 | -0.52711 | H | 3.845304 | -1.42423 | 0.44055  |
| C | -6.50634 | -3.36298 | -0.61522 | H | 10.14474 | -0.04555 | -0.05702 |
| C | -5.44641 | -2.44565 | -0.70008 | H | 10.79147 | -1.60565 | -0.58969 |
| C | -4.38347 | -2.70073 | -1.58117 | H | 10.83511 | -1.17245 | 1.121733 |

**Table S10:** Calculated XYZ coordinates of Ph-Pym-DMAC at optimized  $T_1$  state.

| Atomic Type | Coordinates (Angstroms) |          |          | Atomic Type | Coordinates (Angstroms) |          |          |
|-------------|-------------------------|----------|----------|-------------|-------------------------|----------|----------|
|             | X                       | Y        | X        |             | X                       | Y        | X        |
| N           | -6.07701                | -0.78034 | 0.199212 | C           | -6.81775                | -2.48044 | -2.99545 |
| N           | 0.091252                | 0.770896 | -0.88053 | C           | -8.05953                | -3.04122 | -2.73128 |
| N           | 6.289396                | -0.71559 | 0.063934 | C           | -8.62898                | -2.84225 | -1.48311 |
| N           | 1.121241                | 1.901736 | -2.74649 | C           | -8.93772                | -3.32316 | 1.484591 |
| C           | -7.6333                 | -0.09557 | 4.038291 | C           | 2.635181                | -0.07433 | 0.022169 |
| C           | -6.4001                 | 0.427301 | 3.675075 | C           | 3.87761                 | -0.53791 | 0.413908 |
| C           | -5.89462                | 0.197114 | 2.407826 | C           | 10.25505                | -1.44292 | 0.189967 |
| C           | -6.61108                | -0.56406 | 1.471902 | H           | -8.04188                | 0.076794 | 5.02765  |
| C           | -4.80682                | -0.22196 | -0.12403 | H           | -5.82284                | 1.018935 | 4.377971 |
| C           | -4.7265                 | 1.042739 | -0.69889 | H           | -4.93176                | 0.60993  | 2.134203 |
| C           | -3.48968                | 1.589504 | -1.00554 | H           | -5.64062                | 1.592648 | -0.89431 |
| C           | -2.31149                | 0.870647 | -0.75737 | H           | -3.43024                | 2.58305  | -1.43735 |

|   |          |          |          |   |          |          |          |
|---|----------|----------|----------|---|----------|----------|----------|
| C | -1.01456 | 1.434662 | -1.09448 | H | 3.529931 | 1.562616 | -2.81489 |
| C | 1.199434 | 1.189932 | -1.55011 | H | 5.769854 | 0.729772 | -2.09745 |
| C | 2.496251 | 0.68978  | -1.14901 | H | 9.333798 | -4.11118 | -0.16696 |
| C | 3.641743 | 0.977482 | -1.91013 | H | 7.902212 | -5.44552 | -1.6488  |
| C | 4.88257  | 0.512088 | -1.51266 | H | 9.881758 | -2.01381 | 2.869492 |
| C | 5.008479 | -0.24578 | -0.34904 | H | 9.638937 | -3.49523 | 1.938109 |
| C | 6.731961 | -1.96393 | -0.37937 | H | 8.262762 | -2.71765 | 2.735512 |
| C | 7.983945 | -2.46181 | 0.013129 | H | 5.60597  | 1.661877 | 0.993505 |
| C | 8.367745 | -3.71495 | -0.46352 | H | 6.926565 | 3.099058 | 2.47182  |
| C | 7.565895 | -4.47535 | -1.3006  | H | 9.176498 | 2.349528 | 3.254521 |
| C | 9.193705 | -2.53015 | 2.194634 | H | 10.0336  | 0.168332 | 2.523978 |
| C | 8.926455 | -1.69124 | 0.929993 | H | 4.95188  | -2.34462 | -1.52936 |
| C | 8.329072 | -0.35071 | 1.340836 | H | 5.678657 | -4.53969 | -2.33541 |
| C | 7.066076 | 0.081652 | 0.907583 | H | 0.021114 | 5.187265 | -2.57505 |
| C | 6.580492 | 1.329231 | 1.328165 | H | -0.05919 | 7.294651 | -1.31634 |
| C | 7.328606 | 2.13953  | 2.163521 | H | -0.98831 | 7.345221 | 0.984299 |
| C | 8.579388 | 1.724825 | 2.599687 | H | -1.82635 | 5.253006 | 2.020984 |
| C | 9.055454 | 0.491614 | 2.182069 | H | -1.75318 | 3.133958 | 0.776612 |
| C | 5.917382 | -2.73023 | -1.2268  | H | -0.1416  | 3.025343 | -3.90095 |
| C | 6.330295 | -3.97014 | -1.68096 | H | -3.71845 | -1.92838 | 0.581559 |
| C | -0.85165 | 2.775258 | -1.74954 | H | -1.49169 | -0.96201 | -0.00441 |
| C | -0.85679 | 3.990416 | -0.99773 | H | -9.30317 | -1.2536  | 3.395461 |
| C | -0.3839  | 5.196629 | -1.56863 | H | -9.90935 | -0.24053 | 0.208262 |
| C | -0.42931 | 6.382167 | -0.86076 | H | -10.5903 | -1.10919 | 1.592571 |
| C | -0.94953 | 6.411614 | 0.433713 | H | -10.6926 | -1.81096 | -0.0255  |
| C | -1.42317 | 5.235215 | 1.013858 | H | -5.20182 | -1.30533 | -2.24011 |
| C | -1.38361 | 4.042886 | 0.314947 | H | -6.3435  | -2.6192  | -3.9614  |
| C | 0.059897 | 2.601104 | -2.91805 | H | -8.57794 | -3.6257  | -3.48302 |
| C | -3.639   | -0.94266 | 0.135786 | H | -9.59958 | -3.2825  | -1.27771 |



|   |          |          |          |   |          |          |          |
|---|----------|----------|----------|---|----------|----------|----------|
| C | -2.40568 | -0.40766 | -0.18306 | H | -9.5542  | -3.94416 | 0.829191 |
| C | -8.33849 | -0.84609 | 3.110195 | H | -9.45111 | -3.24188 | 2.446418 |
| C | -7.8595  | -1.09871 | 1.82509  | H | -7.98807 | -3.83875 | 1.647853 |
| C | -8.70044 | -1.93219 | 0.865503 | H | 1.750626 | -0.29155 | 0.608822 |
| C | -10.055  | -1.23081 | 0.647035 | H | 3.990535 | -1.12804 | 1.31706  |
| C | -8.0056  | -2.09998 | -0.48048 | H | 10.08769 | -0.84831 | -0.71158 |
| C | -6.75193 | -1.53652 | -0.76287 | H | 10.72136 | -2.38651 | -0.106   |
| C | -6.17095 | -1.73719 | -2.02405 | H | 10.9636  | -0.90541 | 0.825969 |

#### 4. Thermal and electrical properties

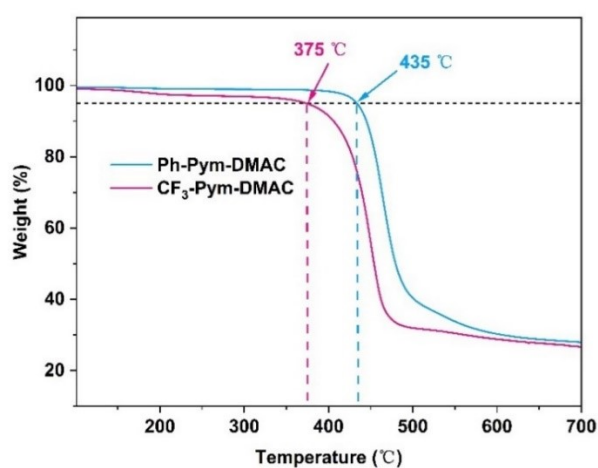

**Figure S1.** TGA curves of  $\text{CF}_3$ -Pym-DMAC and Ph-Pym-DMAC. The black dashed line marks loss 5% of the original sample weight.

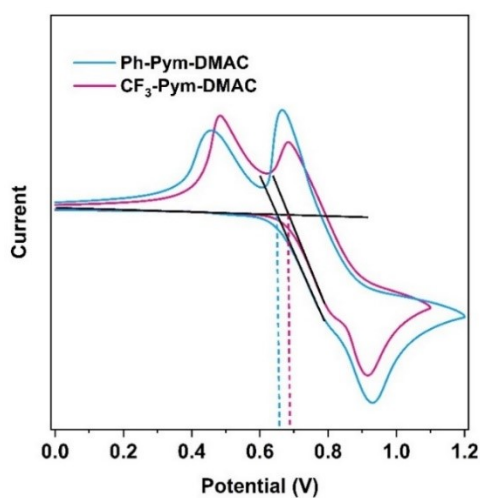

**Figure S2.** Cyclic voltammograms for the oxidation of  $\text{CF}_3$ -Pym-DMAC and Ph-Pym-DMAC in DCM at RT.

Cyclic voltammetry was performed at room temperature in anhydrous and argon-saturated dichloromethane (DCM) solutions of 0.1 M tetrabutylammonium hexafluorophosphate and 1.0 mM investigated compounds with a CHI660 electrochemical analyzer. Glassy carbon as the working electrode, platinum wire was selected as auxiliary electrode and Ag/Ag<sup>+</sup> (0.01 M of AgNO<sub>3</sub> in acetonitrile), ferrocene was used to be reference electrode and internal standard, respectively. The HOMO and LUMO energy levels were calculated according to the equation:  $E_{\text{HOMO}} = - [ E_{\text{ox}} - E_{\text{Fc/Fc}^+} + 4.8 ] \text{ eV}$ ,  $E_{\text{g}} = 1241 / \lambda_{\text{onset}}$ ,  $E_{\text{LUMO}} = E_{\text{HOMO}} + E_{\text{g}}$ . The HOMO and LUMO energy levels were estimated from the cyclic voltammetry and optical bandgaps ( $E_{\text{g}}$ ) determined from the onset of the absorption band ( $\lambda_{\text{onset}}$ ). Based on the above formulas, HOMO/LUMO energy levels of CF<sub>3</sub>-Pym-DMAC and Ph-Pym-DMAC were calculated to be -5.27/-2.50 eV and -5.23/-2.28 eV, respectively.

**Table S11.** Summary of  $T_{\text{d}}$ , CV data and energy levels.

|                           | $T_{\text{d}}^{\text{a}}$<br>[°C] | $E_{\text{ox}}^{\text{b}}$<br>[eV] | $E_{\text{Fc/Fc}^+}^{\text{b}}$<br>[eV] | $E_{\text{g}}^{\text{b}}$<br>[eV] | $E_{\text{HOMO}}^{\text{b}}$<br>[eV] | $E_{\text{LUMO}}^{\text{b}}$<br>[eV] |
|---------------------------|-----------------------------------|------------------------------------|-----------------------------------------|-----------------------------------|--------------------------------------|--------------------------------------|
| CF <sub>3</sub> -Pym-DMAC | 375                               | 0.69                               | 0.22                                    | 2.77                              | -5.27                                | -2.50                                |
| Ph-Pym-DMAC               | 435                               | 0.65                               | 0.22                                    | 2.95                              | -5.23                                | -2.28                                |

<sup>a)</sup> Thermal decomposition temperature corresponding to 5% weight loss. <sup>b)</sup> HOMO levels were calculated from the oxidation onset potentials in CV curves. LUMO levels estimated by the empirical equation  $E_{\text{LUMO}} = E_{\text{HOMO}} + E_{\text{g}}$ .

## 5. Photophysical Properties

Steady-state photoluminescence spectra were measured on the FLS980 in Edinburgh with a xenon lamp as the excitation light source. The life test uses the NT242-1K OPO laser as the light source, and the photoluminescence attenuation curve is measured in time-dependent single-photon counting mode on the FLS980 in Edinburgh, and the final lifetime is obtained by fitting the attenuation curve. The low-temperature time-resolved spectroscopy test was tested on the Lincoln heating table to 77 K, and the NT242-1K OPO laser was used as the excitation source, and the time-resolved

photoluminescence spectrum was tested on the LP980 spectrophotometer in Edinburgh. Rate constants of the investigated compounds in 20 wt% BCPO films at room temperature are determined from the measured quantum yields and lifetimes of the prompt fluorescence (PF) and delayed fluorescence (DF) components according to equations S1-S6.<sup>3</sup>

$$k_{PF} = \frac{1}{\tau_{PF}} \quad \text{Equation S1}$$

$$k_{DF} = \frac{1}{\tau_{DF}} \quad \text{Equation S2}$$

$$k_{RISC} = \frac{k_{PF} + k_{DF}}{2} - \sqrt{\left(\frac{k_{PF} + k_{DF}}{2}\right)^2 - k_{PF}k_{DF}\left(1 + \frac{\Phi_{DF}}{\Phi_{PF}}\right)} \quad \text{Equation S3}$$

$$k_{ISC} = \frac{k_{PF}k_{DF}\Phi_{DF}}{k_{RISC}\Phi_{PF}} \quad \text{Equation S4}$$

$$k_r^S \approx \frac{k_{PF}k_{DF}}{k_{RISC}}\Phi_{PL} \quad \text{Equation S5}$$

$$k_{nr}^S \approx \frac{k_{PF}k_{DF}}{k_{RISC}}(1 - \Phi_{PL}) \quad \text{Equation S6}$$

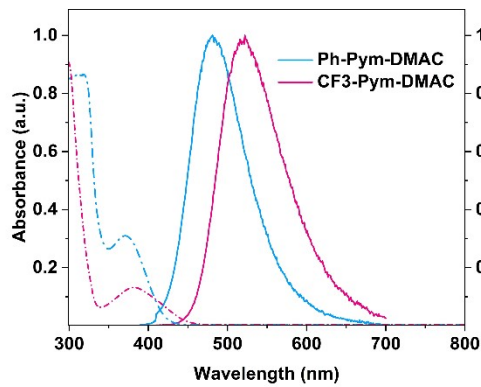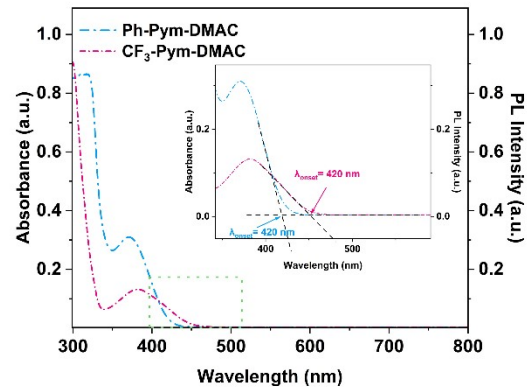

**Figure S3.** Left: UV-vis absorption spectra of CF<sub>3</sub>-Pym-DMAC and Ph-Pym-DMAC in diluted toluene solutions ( $1 \times 10^{-5}$  M); Right: PL spectra of CF<sub>3</sub>-Pym-DMAC and Ph-Pym-DMAC in 20 wt%-doped BCPO films at room temperature (excited at 410 nm).

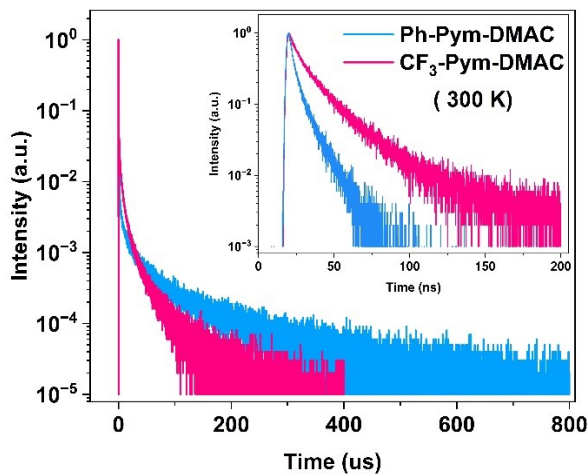

**Figure S4.** Temperature-dependent transient PL spectra with films in vacuum-deposited 20 wt%-doped BCPO host at 300 K.

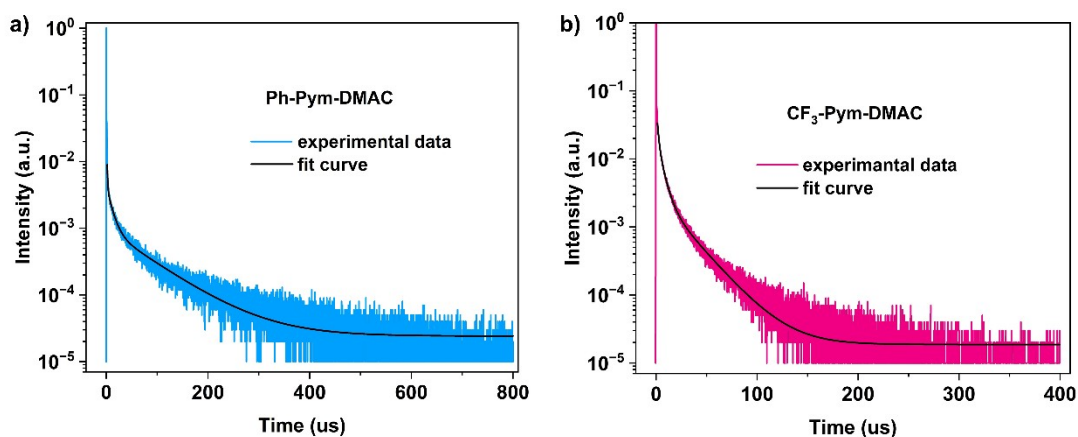

**Figure S5.** Transient PL decay curves of Ph-Pym-DMAC and CF<sub>3</sub>-Pym-DMAC in 20 wt% doped BCPO at 300 K. The black line indicates the fitting curve.

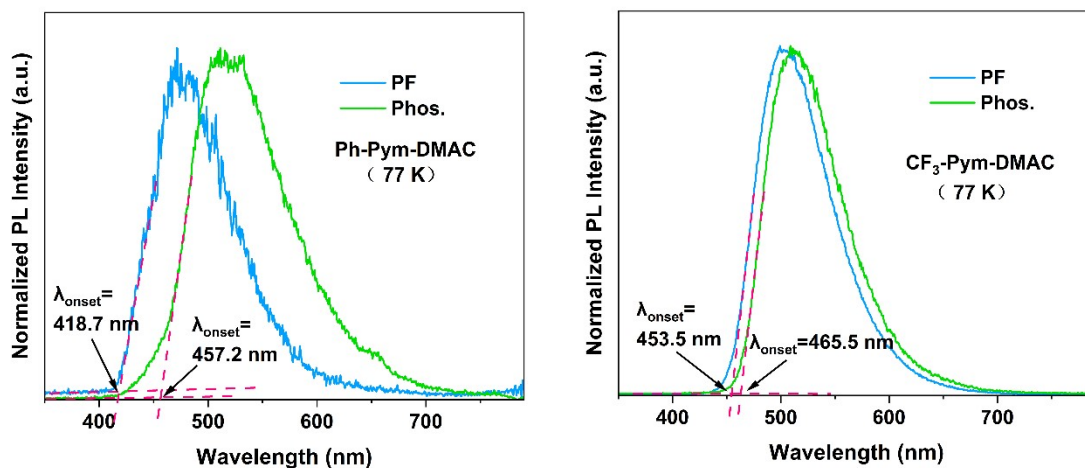

**Figure S6.** Time-resolved PL spectra in the 20 wt%-doped BCPO films at 77 K. The intersections of red tangent lines indicate the onset wavelengths.

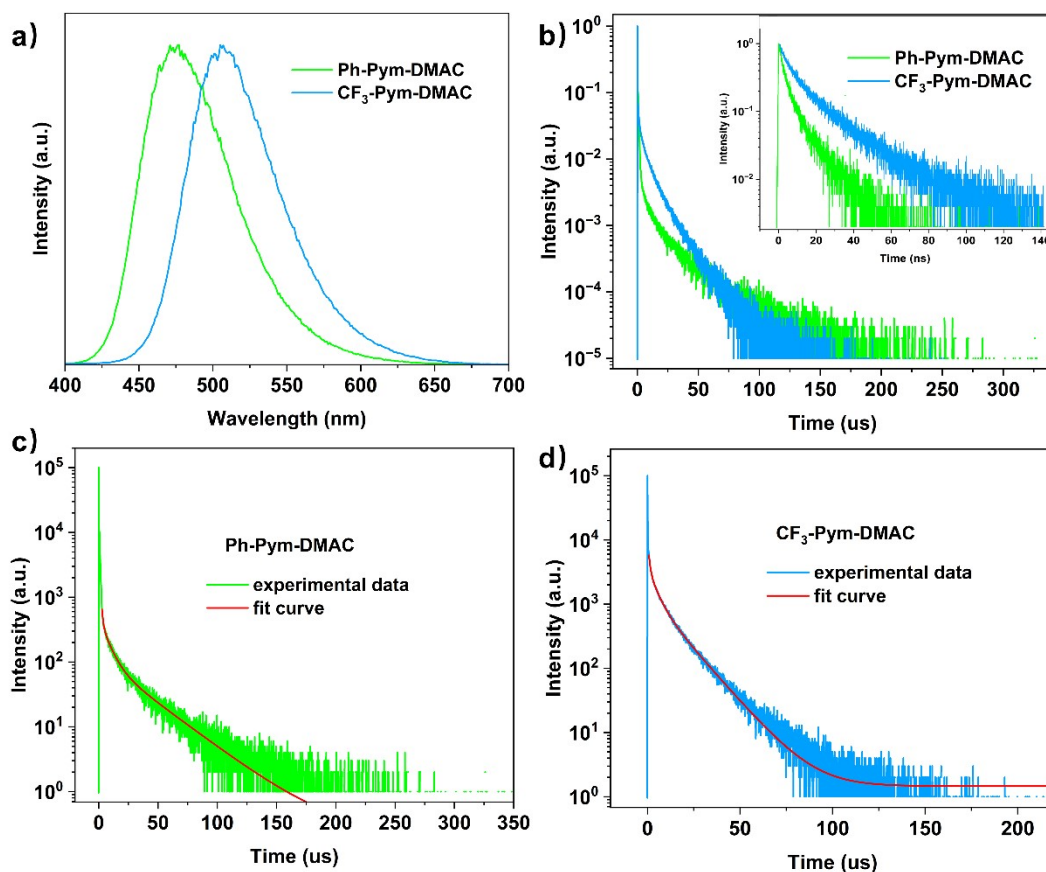

**Figure S7.** a) Steady-state photoluminescence spectra of Ph-Pym-DMAC and CF<sub>3</sub>-Pym-DMAC in non-doped films at 300 K (excited at 380 nm); Transient PL decay curves of Ph-Pym-DMAC and CF<sub>3</sub>-Pym-DMAC in non-doped films at 300 K; the inset shows the corresponding fractional contributions of prompt fluorescence and delayed fluorescence; c/d) Transient PL decay curves of

Ph-Pym-DMAC and CF<sub>3</sub>-Pym-DMAC in non-doped films at 300 K; The black line indicates the fitting curve.

**Table S12.** Photophysical data of CF<sub>3</sub>-Pym-DMAC and Ph-Pym-DMAC in neat films.

| Compound                  | $\lambda_{\text{PL}}^{\text{a}}$<br>nm | $\Phi_{\text{PL}}/\Phi_{\text{PF}}/\Phi_{\text{DF}}^{\text{b}}$<br>% | $\tau_{\text{PF}}/\tau_{\text{DF}}^{\text{c}}$<br>ns/ $\mu\text{s}$ | $k_{\text{r}}^{\text{S}}/k_{\text{nr}}^{\text{S}}$<br>$10^7\text{s}^{-1}$ | $k_{\text{ISC}}/k_{\text{RISC}}^{\text{f}}$<br>$10^7/10^5\text{s}^{-1}$ |
|---------------------------|----------------------------------------|----------------------------------------------------------------------|---------------------------------------------------------------------|---------------------------------------------------------------------------|-------------------------------------------------------------------------|
| Ph-Pym-DMAC               | 475                                    | 24/18/6                                                              | 8.4/19.9                                                            | 2.17/6.88                                                                 | 2.80/0.66                                                               |
| CF <sub>3</sub> -Pym-DMAC | 505                                    | 79/22/57                                                             | 15.3/8.6                                                            | 1.35/0.38                                                                 | 4.76/4.38                                                               |

Measured in 20 wt% doped BCPO films: <sup>a)</sup> PL emission peak (excited at 335 nm); <sup>b)</sup> Overall PLQY;  $\Phi_{\text{PF}}$  and  $\Phi_{\text{DF}}$  are the quantum yields of prompt fluorescence and delayed fluorescence, respectively; <sup>c)</sup> Fluorescence lifetimes of prompt ( $\tau_{\text{PF}}$ ) and delayed ( $\tau_{\text{DF}}$ ) components evaluated at 300 K; <sup>d)</sup> Determined from the onset of fluorescence/phosphorescence spectrum at 77 K; <sup>e)</sup> Rate constants of radiative and nonradiative of S<sub>1</sub> states, respectively; <sup>f)</sup> Rate constants of intersystem crossing (ISC) and reverse ISC, respectively.

**Table S13.** Key photophysical properties of pyrimidine and methylacridine based emitters.

| Emitter      | $\lambda_{\text{EL}}$<br>nm | $k_{\text{RISC}}$<br>$10^5\text{s}^{-1}$ | $\tau_{\text{d}}$<br>$\mu\text{s}$ | EQE<br>% | Ref.      |
|--------------|-----------------------------|------------------------------------------|------------------------------------|----------|-----------|
| CF3-Pym-DMAC | 510                         | 5.84                                     | 10.2                               | 25.0     | This work |
| Ac-PPM       | 458                         | 0.11                                     | 78                                 | 11.4     | 4         |
| T3           | 464                         | 0.74                                     | 24.5                               | 14.2     | 5         |
| T4           | 476                         | 7.39                                     | 61.5                               | 11.8     | 5         |
| 22bpmAc      | 517                         | 0.43                                     | 37.5                               | 15.7     | 6         |
| 25bpmAc      | 524                         | 0.92                                     | 17.1                               | 20.5     | 6         |
| 55bpmAc      | 512                         | 0.79                                     | 21.8                               | 24.9     | 6         |
| AcPYM        | 487                         | 0.01                                     | 486                                | 11.9     | 7         |
| AcRPy        | 475                         | 57                                       | 1.76                               | 14.3     | 8         |
| 23AcCz-PM    | 499                         | 1.8                                      | 3.4                                | 28.4     | 9         |

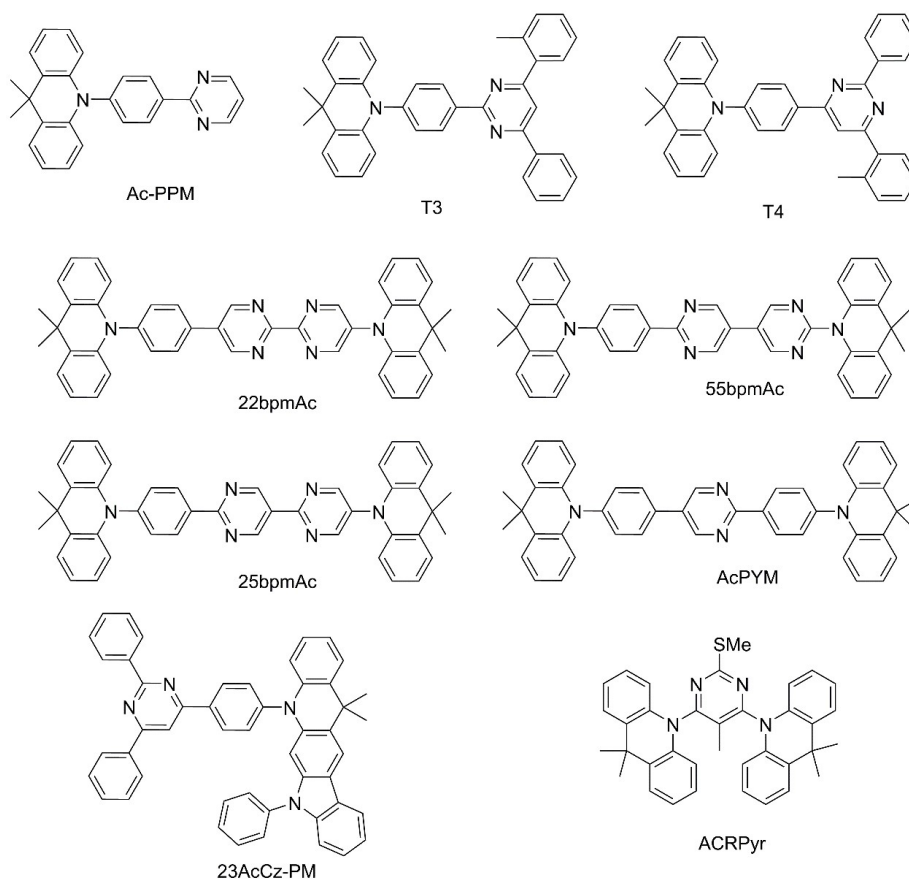

**Figure S8.** The structures of emitters base on pyrimidine and methylacridine.

## 6. Device Fabrication and Characterization

The indium tin oxide (ITO) glass surface was ultrasonically cleaned with detergent, deionized water, acetone and ethanol for 15 minutes, and then the cleaned sheets were purged with dry nitrogen to remove the solvent on the surface, and finally treated with ultraviolet ozone for 15 minutes. The organic materials including TAPC, mCP, DPEPO, TmPyPB, and the EML of the multilayer device is sequentially deposited onto ITO glass at a base pressure less than  $2 \times 10^{-5}$  Pa by thermal evaporation in a vacuum chamber at a rate of  $1 \text{ \AA/s}^{-1}$ , and inorganic layers (Liq and Al) were under  $4 \times 10^{-4}$  Pa at a rate of 0.1 and  $5 \text{ \AA/s}^{-1}$ , respectively. The electroluminescence (EL) spectra, Commission Internatinal de L'Eclairage coordinates (CIE), current density-voltage (J-V) curves, and luminance-voltage (L-V) curves of the device were measured using the TOPCON SR-UL1R spectroradiometer and the Keithley 2400 source meter.

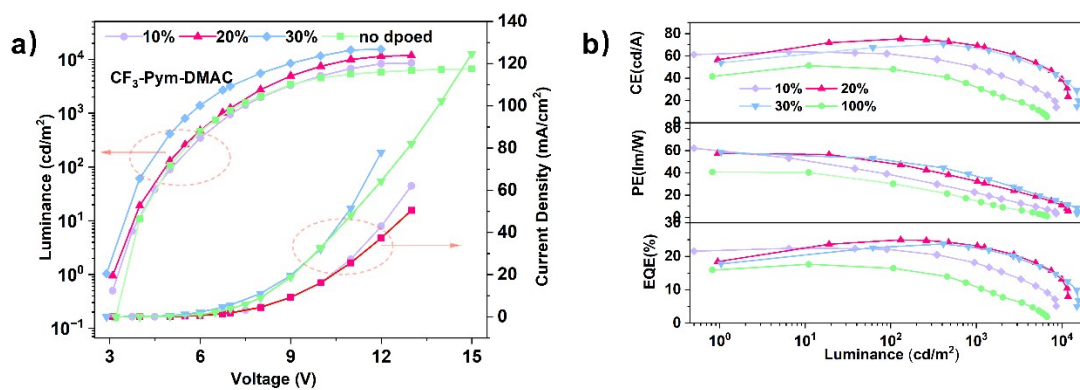

**Figure S9.** a) Current density–voltage–luminance characteristics; b) external quantum efficiency (EQE), current efficiency (CE) and power efficiency (PE) - luminance curves.

**Table S14.** The important characteristics of device.

| CF <sub>3</sub> -Pym-DMAC | $\lambda_{EL}^a$ | $L_{max}^b$          | $V_{on}^c$ | EQE <sup>d</sup> | CE <sup>e</sup> | PE <sup>e</sup> | CIE <sup>f</sup> |
|---------------------------|------------------|----------------------|------------|------------------|-----------------|-----------------|------------------|
|                           | [nm]             | [cd/m <sup>2</sup> ] | [V]        | [%]              | [cd/A]          | [lm/W]          | [x,y]            |
| 10%                       | 507              | 8614                 | 3.3        | 22.3/22.0/18.0   | 63.7            | 62.1            | 0.27,0.51        |
| 20%                       | 510              | 11820                | 3.1        | 25.0/24.8/23.2   | 75.3            | 57.3            | 0.28,0.55        |
| 30%                       | 511              | 15610                | 2.9        | 23.7/22.9/22.4   | 70.6            | 58.3            | 0.30,0.55        |
| 100%                      | 505              | 6687                 | 3.5        | 17.6/16.5/10.9   | 51.2            | 40.8            | 0.28,0.53        |

a) record at maximum EQE; b) maximum luminance c)  $V_{on}$ , the turn-on voltage recorded at 1 cd/m<sup>2</sup>; d) EQE maximum value, value at 100 cd/m<sup>2</sup> and value at 1000 cd/m<sup>2</sup>; e) maximum current efficiency and maximum power efficiency; f) Commission Internationale de L'Eclairage coordinates measured.

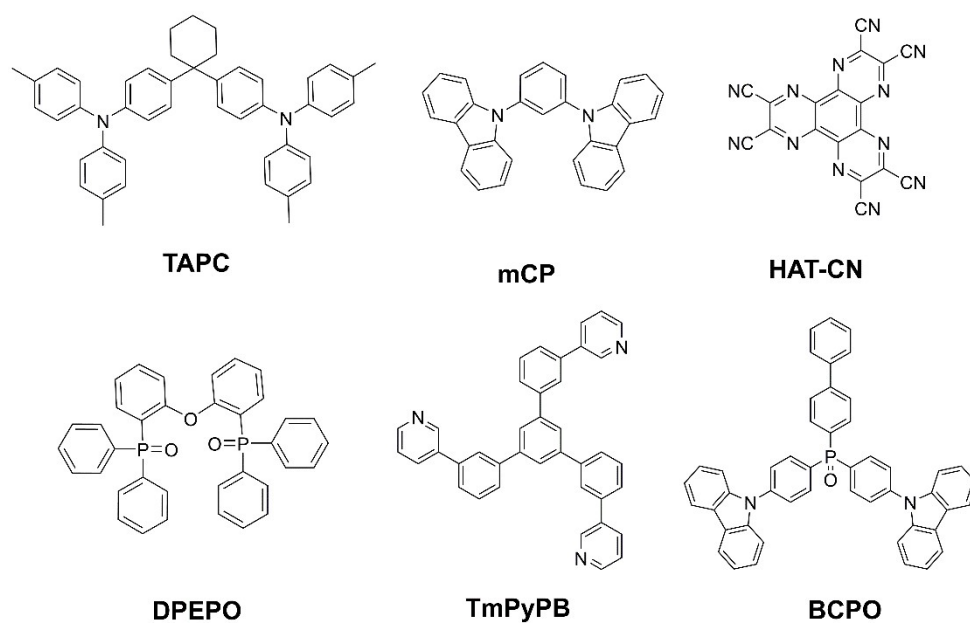

**Figure S10.** The Molecular structures of materials used in OLEDs.



## 7. Structural characteristics

The crystals of CF<sub>3</sub>-Pym-DMAC and Ph-Pym-DMAC were obtained by diffusion method at room temperature, further confirming the exact configurations by single-crystal X-ray diffraction. The single crystal was collected at 200 K by Bruker's diffraction data on the D8 VENTRUE diffractometer, and the X-ray source used K $\alpha$  radiation from the molybdenum target ( $\lambda = 0.71073 \text{ \AA}$ ). The crystal structure is resolved by direct method and differential Fourier synthesis method. Finally, it was checked by check cif and there were no class A errors.

**Table S15.** Crystal data and structure refinements.

| Compounds                             | CF <sub>3</sub> -Pym-DMAC                                     | Ph-Pym-DMAC                                    |
|---------------------------------------|---------------------------------------------------------------|------------------------------------------------|
| Empirical formula                     | C <sub>47</sub> H <sub>37</sub> N <sub>4</sub> F <sub>3</sub> | C <sub>52</sub> H <sub>42</sub> N <sub>4</sub> |
| Formula weight                        | 714.80                                                        | 722.89                                         |
| Temperature/K                         | 200.00                                                        | 200.00                                         |
| Crystal system                        | monoclinic                                                    | monoclinic                                     |
| Space group                           | P2 <sub>1</sub> /c                                            | P2 <sub>1</sub> /c                             |
| a/Å                                   | 19.5350(10)                                                   | 16.1698(7)                                     |
| b/Å                                   | 8.1840(4)                                                     | 8.0307(3)                                      |
| c/Å                                   | 23.4718(12)                                                   | 30.1569(13)                                    |
| $\alpha$ /°                           | 90                                                            | 90                                             |
| $\beta$ /°                            | 93.966(2)                                                     | 97.3910(10)                                    |
| $\gamma$ /°                           | 90                                                            | 90                                             |
| Volume/Å <sup>3</sup>                 | 3743.6(3)                                                     | 3883.5(3)                                      |
| Z                                     | 4                                                             | 4                                              |
| $\rho_{\text{calc}}$ /cm <sup>3</sup> | 1.268                                                         | 1.236                                          |
| $\mu$ /mm <sup>-1</sup>               | 0.085                                                         | 0.072                                          |
| F(000)                                | 1496.0                                                        | 1528.0                                         |
| Crystal size/mm <sup>3</sup>          | 0.4 × 0.3 × 0.2                                               | 0.4 × 0.4 × 0.2                                |
| Radiation                             | MoK $\alpha$ ( $\lambda = 0.71073$ )                          | MoK $\alpha$ ( $\lambda = 0.71073$ )           |
| 2 $\Theta$ range for                  | 5.25 to 50.036                                                | 3.956 to 55.07                                 |

|                                             |                                                               |                                                               |
|---------------------------------------------|---------------------------------------------------------------|---------------------------------------------------------------|
| data collection/°                           |                                                               |                                                               |
| Index ranges                                | -23 ≤ h ≤ 23, -9 ≤ k ≤ 9, -27 ≤ l ≤ 27                        | -21 ≤ h ≤ 20, -10 ≤ k ≤ 10, -39 ≤ l ≤ 39                      |
| Reflections collected                       | 54658                                                         | 44362                                                         |
| Independent reflections                     | 6591 [R <sub>int</sub> = 0.0919, R <sub>sigma</sub> = 0.0452] | 8921 [R <sub>int</sub> = 0.0814, R <sub>sigma</sub> = 0.0611] |
| Data/restraints/parameters                  | 6591/0/482                                                    | 8921/0/509                                                    |
| Goodness-of-fit on F <sup>2</sup>           | 1.040                                                         | 1.019                                                         |
| Final R indexes [I ≥ 2σ(I)]                 | R <sub>1</sub> = 0.0680, wR <sub>2</sub> = 0.1778             | R <sub>1</sub> = 0.0658, wR <sub>2</sub> = 0.1640             |
| Final R indexes [all data]                  | R <sub>1</sub> = 0.1050, wR <sub>2</sub> = 0.2112             | R <sub>1</sub> = 0.1247, wR <sub>2</sub> = 0.2060             |
| Largest diff. peak/hole / e Å <sup>-3</sup> | 1.20/-0.60                                                    | 0.43/-0.25                                                    |

**Table S16.** Bond Lengths for CF<sub>3</sub>-Pym-DMAC.

| Atom | Atom | Length/Å | Atom | Atom | Length/Å |
|------|------|----------|------|------|----------|
| F1   | C45  | 1.329(5) | C13  | C14  | 1.387(5) |
| F2   | C45  | 1.327(4) | C14  | C47  | 1.384(5) |
| F3   | C45  | 1.336(4) | C15  | C16  | 1.398(4) |
| N1   | C4   | 1.419(4) | C15  | C23  | 1.393(4) |
| N1   | C5   | 1.438(4) | C16  | C17  | 1.528(5) |
| N1   | C41  | 1.424(4) | C16  | C20  | 1.396(5) |
| N2   | C9   | 1.337(4) | C17  | C18  | 1.606(7) |
| N2   | C10  | 1.343(4) | C17  | C19  | 1.452(7) |
| N3   | C14  | 1.438(4) | C17  | C29  | 1.500(5) |
| N3   | C15  | 1.408(4) | C20  | C21  | 1.385(5) |
| N3   | C24  | 1.400(4) | C21  | C22  | 1.373(5) |

|     |     |          |     |     |          |
|-----|-----|----------|-----|-----|----------|
| N4  | C10 | 1.330(4) | C22 | C23 | 1.376(5) |
| N4  | C44 | 1.330(4) | C24 | C25 | 1.393(5) |
| C1  | C2  | 1.538(5) | C24 | C29 | 1.399(5) |
| C2  | C3  | 1.521(4) | C25 | C26 | 1.380(6) |
| C2  | C36 | 1.516(5) | C26 | C27 | 1.380(6) |
| C2  | C42 | 1.553(5) | C27 | C28 | 1.371(6) |
| C3  | C4  | 1.403(4) | C28 | C29 | 1.401(5) |
| C3  | C35 | 1.386(5) | C30 | C31 | 1.380(4) |
| C4  | C32 | 1.395(4) | C32 | C33 | 1.388(5) |
| C5  | C6  | 1.377(4) | C33 | C34 | 1.379(5) |
| C5  | C30 | 1.387(4) | C34 | C35 | 1.383(5) |
| C6  | C7  | 1.381(5) | C36 | C37 | 1.401(4) |
| C7  | C8  | 1.382(4) | C36 | C41 | 1.407(4) |
| C8  | C9  | 1.485(4) | C37 | C38 | 1.369(5) |
| C8  | C31 | 1.384(4) | C38 | C39 | 1.380(5) |
| C9  | C43 | 1.397(5) | C39 | C40 | 1.386(5) |
| C10 | C11 | 1.492(4) | C40 | C41 | 1.389(4) |
| C11 | C12 | 1.390(4) | C43 | C44 | 1.374(5) |
| C11 | C46 | 1.391(4) | C43 | C45 | 1.503(5) |
| C12 | C13 | 1.390(4) | C46 | C47 | 1.386(5) |

**Table S17.** Bond Angles for CF<sub>3</sub>-Pym-DMAC.

| A  | B   | C   | D   | Angle/°   | A   | B   | C   | D   | Angle/°   |
|----|-----|-----|-----|-----------|-----|-----|-----|-----|-----------|
| N1 | C4  | C32 | C33 | -175.2(3) | C14 | N3  | C24 | C29 | -173.8(3) |
| N1 | C5  | C6  | C7  | -180.0(3) | C15 | N3  | C14 | C13 | 84.1(4)   |
| N1 | C5  | C30 | C31 | 178.3(3)  | C15 | N3  | C14 | C47 | -93.5(4)  |
| N2 | C9  | C43 | C44 | 1.3(5)    | C15 | N3  | C24 | C25 | -170.1(3) |
| N2 | C9  | C43 | C45 | -176.9(3) | C15 | N3  | C24 | C29 | 8.5(5)    |
| N2 | C10 | C11 | C12 | 2.9(5)    | C15 | C16 | C17 | C18 | 132.0(4)  |

---

|    |     |     |     |           |     |     |     |     |           |
|----|-----|-----|-----|-----------|-----|-----|-----|-----|-----------|
| N2 | C10 | C11 | C46 | 180.0(3)  | C15 | C16 | C17 | C19 | -109.7(4) |
| N3 | C14 | C47 | C46 | 175.4(3)  | C15 | C16 | C17 | C29 | 14.2(5)   |
| N3 | C15 | C16 | C17 | -4.2(5)   | C15 | C16 | C20 | C21 | 0.7(5)    |
| N3 | C15 | C16 | C20 | 177.8(3)  | C16 | C15 | C23 | C22 | 1.3(5)    |
| N3 | C15 | C23 | C22 | -178.3(3) | C16 | C17 | C29 | C24 | -13.8(5)  |
| N3 | C24 | C25 | C26 | 178.5(4)  | C16 | C17 | C29 | C28 | 168.2(4)  |
| N3 | C24 | C29 | C17 | 3.4(5)    | C16 | C20 | C21 | C22 | 1.0(6)    |
| N3 | C24 | C29 | C28 | -178.5(3) | C17 | C16 | C20 | C21 | -177.3(4) |
| N4 | C10 | C11 | C12 | -175.7(3) | C18 | C17 | C29 | C24 | -132.0(4) |
| N4 | C10 | C11 | C46 | 1.3(5)    | C18 | C17 | C29 | C28 | 50.0(5)   |
| C1 | C2  | C3  | C4  | 167.6(3)  | C19 | C17 | C29 | C24 | 110.4(5)  |
| C1 | C2  | C3  | C35 | -15.6(5)  | C19 | C17 | C29 | C28 | -67.6(5)  |
| C1 | C2  | C36 | C37 | 15.2(4)   | C20 | C16 | C17 | C18 | -50.1(5)  |
| C1 | C2  | C36 | C41 | -168.5(3) | C20 | C16 | C17 | C19 | 68.2(5)   |
| C2 | C3  | C4  | N1  | -10.0(4)  | C20 | C16 | C17 | C29 | -167.9(3) |
| C2 | C3  | C4  | C32 | 171.1(3)  | C20 | C21 | C22 | C23 | -1.5(6)   |
| C2 | C3  | C35 | C34 | -173.1(3) | C21 | C22 | C23 | C15 | 0.4(5)    |
| C2 | C36 | C37 | C38 | 172.0(3)  | C23 | C15 | C16 | C17 | 176.2(3)  |
| C2 | C36 | C41 | N1  | 11.6(4)   | C23 | C15 | C16 | C20 | -1.8(5)   |
| C2 | C36 | C41 | C40 | -169.1(3) | C24 | N3  | C14 | C13 | -93.6(4)  |
| C3 | C2  | C36 | C37 | 139.1(3)  | C24 | N3  | C14 | C47 | 88.8(4)   |
| C3 | C2  | C36 | C41 | -44.7(4)  | C24 | N3  | C15 | C16 | -8.0(5)   |
| C3 | C4  | C32 | C33 | 3.8(5)    | C24 | N3  | C15 | C23 | 171.5(3)  |
| C4 | N1  | C5  | C6  | -102.1(3) | C24 | C25 | C26 | C27 | 0.6(8)    |
| C4 | N1  | C5  | C30 | 77.7(4)   | C25 | C24 | C29 | C17 | -178.0(4) |
| C4 | N1  | C41 | C36 | 26.7(4)   | C25 | C24 | C29 | C28 | 0.1(5)    |
| C4 | N1  | C41 | C40 | -152.6(3) | C25 | C26 | C27 | C28 | -1.0(9)   |
| C4 | C3  | C35 | C34 | 3.7(5)    | C26 | C27 | C28 | C29 | 1.0(8)    |
| C4 | C32 | C33 | C34 | 0.9(5)    | C27 | C28 | C29 | C17 | 177.6(4)  |

---

---

|     |     |     |     |           |     |     |     |     |           |
|-----|-----|-----|-----|-----------|-----|-----|-----|-----|-----------|
| C5  | N1  | C4  | C3  | -177.6(3) | C27 | C28 | C29 | C24 | -0.5(6)   |
| C5  | N1  | C4  | C32 | 1.4(4)    | C29 | C24 | C25 | C26 | -0.1(6)   |
| C5  | N1  | C41 | C36 | 176.9(3)  | C30 | C5  | C6  | C7  | 0.2(5)    |
| C5  | N1  | C41 | C40 | -2.4(4)   | C31 | C8  | C9  | N2  | -119.7(3) |
| C5  | C6  | C7  | C8  | 1.8(5)    | C31 | C8  | C9  | C43 | 60.9(4)   |
| C5  | C30 | C31 | C8  | 1.6(5)    | C32 | C33 | C34 | C35 | -3.2(5)   |
| C6  | C5  | C30 | C31 | -1.9(5)   | C33 | C34 | C35 | C3  | 0.9(5)    |
| C6  | C7  | C8  | C9  | 179.6(3)  | C35 | C3  | C4  | N1  | 173.0(3)  |
| C6  | C7  | C8  | C31 | -2.2(5)   | C35 | C3  | C4  | C32 | -5.9(4)   |
| C7  | C8  | C9  | N2  | 58.5(4)   | C36 | C2  | C3  | C4  | 43.8(4)   |
| C7  | C8  | C9  | C43 | -120.9(4) | C36 | C2  | C3  | C35 | -139.4(3) |
| C7  | C8  | C31 | C30 | 0.4(5)    | C36 | C37 | C38 | C39 | -1.7(5)   |
| C8  | C9  | C43 | C44 | -179.3(3) | C37 | C36 | C41 | N1  | -171.8(3) |
| C8  | C9  | C43 | C45 | 2.5(5)    | C37 | C36 | C41 | C40 | 7.5(4)    |
| C9  | N2  | C10 | N4  | 2.2(5)    | C37 | C38 | C39 | C40 | 4.5(5)    |
| C9  | N2  | C10 | C11 | -176.3(3) | C38 | C39 | C40 | C41 | -1.2(5)   |
| C9  | C8  | C31 | C30 | 178.7(3)  | C39 | C40 | C41 | N1  | 174.4(3)  |
| C9  | C43 | C44 | N4  | 0.3(6)    | C39 | C40 | C41 | C36 | -4.9(5)   |
| C9  | C43 | C45 | F1  | 46.0(5)   | C41 | N1  | C4  | C3  | -27.5(4)  |
| C9  | C43 | C45 | F2  | -74.4(5)  | C41 | N1  | C4  | C32 | 151.4(3)  |
| C9  | C43 | C45 | F3  | 164.9(3)  | C41 | N1  | C5  | C6  | 107.8(3)  |
| C10 | N2  | C9  | C8  | 178.1(3)  | C41 | N1  | C5  | C30 | -72.4(4)  |
| C10 | N2  | C9  | C43 | -2.5(4)   | C41 | C36 | C37 | C38 | -4.3(4)   |
| C10 | N4  | C44 | C43 | -0.7(6)   | C42 | C2  | C3  | C4  | -72.8(3)  |
| C10 | C11 | C12 | C13 | 174.2(3)  | C42 | C2  | C3  | C35 | 104.0(4)  |
| C10 | C11 | C46 | C47 | -174.5(3) | C42 | C2  | C36 | C37 | -104.5(3) |
| C11 | C12 | C13 | C14 | 0.7(5)    | C42 | C2  | C36 | C41 | 71.7(3)   |
| C11 | C46 | C47 | C14 | -0.1(5)   | C44 | N4  | C10 | N2  | -0.5(6)   |
| C12 | C11 | C46 | C47 | 2.6(5)    | C44 | N4  | C10 | C11 | 178.0(3)  |

---

|     |     |     |     |           |     |     |     |     |           |
|-----|-----|-----|-----|-----------|-----|-----|-----|-----|-----------|
| C12 | C13 | C14 | N3  | -175.7(3) | C44 | C43 | C45 | F1  | -132.2(4) |
| C12 | C13 | C14 | C47 | 1.9(5)    | C44 | C43 | C45 | F2  | 107.4(4)  |
| C13 | C14 | C47 | C46 | -2.2(5)   | C44 | C43 | C45 | F3  | -13.2(5)  |
| C14 | N3  | C15 | C16 | 174.3(3)  | C45 | C43 | C44 | N4  | 178.6(4)  |
| C14 | N3  | C15 | C23 | -6.2(5)   | C46 | C11 | C12 | C13 | -2.9(5)   |
| C14 | N3  | C24 | C25 | 7.6(5)    |     |     |     |     |           |

**Table S18.** Bond Lengths for Ph-Pym-DMAC.

| Atom | Atom | Length/Å | Atom | Atom | Length/Å |
|------|------|----------|------|------|----------|
| N1   | C4   | 1.400(3) | C18  | C28  | 1.377(4) |
| N1   | C5   | 1.442(3) | C19  | C20  | 1.542(4) |
| N1   | C44  | 1.404(3) | C20  | C21  | 1.524(3) |
| N2   | C9   | 1.344(3) | C20  | C52  | 1.559(3) |
| N2   | C10  | 1.342(3) | C21  | C22  | 1.400(3) |
| N3   | C14  | 1.444(3) | C21  | C26  | 1.397(3) |
| N3   | C15  | 1.409(3) | C22  | C23  | 1.403(3) |
| N3   | C22  | 1.400(3) | C23  | C24  | 1.374(3) |
| N4   | C10  | 1.345(3) | C24  | C25  | 1.380(4) |
| N4   | C36  | 1.331(3) | C25  | C26  | 1.377(4) |
| C1   | C2   | 1.385(4) | C27  | C28  | 1.380(3) |
| C1   | C39  | 1.375(4) | C29  | C30  | 1.480(4) |
| C2   | C3   | 1.374(4) | C29  | C36  | 1.389(4) |
| C3   | C4   | 1.397(3) | C30  | C31  | 1.379(4) |
| C4   | C40  | 1.403(3) | C30  | C35  | 1.398(4) |
| C5   | C6   | 1.380(4) | C31  | C32  | 1.386(5) |
| C5   | C37  | 1.383(3) | C32  | C33  | 1.360(6) |
| C6   | C7   | 1.382(3) | C33  | C34  | 1.368(5) |
| C7   | C8   | 1.403(3) | C34  | C35  | 1.389(4) |
| C8   | C9   | 1.490(3) | C37  | C38  | 1.381(3) |

|     |     |          |     |     |          |
|-----|-----|----------|-----|-----|----------|
| C8  | C38 | 1.376(3) | C39 | C40 | 1.399(4) |
| C9  | C29 | 1.402(4) | C40 | C41 | 1.521(4) |
| C10 | C11 | 1.480(3) | C41 | C42 | 1.546(3) |
| C11 | C12 | 1.390(3) | C41 | C43 | 1.518(4) |
| C11 | C50 | 1.394(4) | C41 | C49 | 1.548(4) |
| C12 | C13 | 1.387(3) | C43 | C44 | 1.399(3) |
| C13 | C14 | 1.383(3) | C43 | C48 | 1.394(4) |
| C14 | C51 | 1.382(3) | C44 | C45 | 1.399(4) |
| C15 | C16 | 1.402(3) | C45 | C46 | 1.380(4) |
| C15 | C27 | 1.398(3) | C46 | C47 | 1.379(4) |
| C16 | C17 | 1.390(3) | C47 | C48 | 1.365(4) |
| C16 | C20 | 1.522(3) | C50 | C51 | 1.387(3) |
| C17 | C18 | 1.378(4) |     |     |          |

**Table S19.** Bond Angles for Ph-Pym-DMAC.

| Atom | Atom | Atom | Angle/°    | Atom | Atom | Atom | Angle/°  |
|------|------|------|------------|------|------|------|----------|
| C4   | N1   | C5   | 118.3(2)   | C21  | C20  | C52  | 109.3(2) |
| C4   | N1   | C44  | 122.0(2)   | C22  | C21  | C20  | 122.9(2) |
| C44  | N1   | C5   | 119.67(19) | C26  | C21  | C20  | 120.0(2) |
| C10  | N2   | C9   | 117.8(2)   | C26  | C21  | C22  | 117.1(2) |
| C15  | N3   | C14  | 119.07(18) | N3   | C22  | C23  | 120.0(2) |
| C22  | N3   | C14  | 118.10(18) | C21  | C22  | N3   | 120.0(2) |
| C22  | N3   | C15  | 121.25(18) | C21  | C22  | C23  | 120.0(2) |
| C36  | N4   | C10  | 115.6(2)   | C24  | C23  | C22  | 120.7(2) |
| C39  | C1   | C2   | 119.2(3)   | C23  | C24  | C25  | 120.4(2) |
| C3   | C2   | C1   | 119.5(3)   | C26  | C25  | C24  | 118.8(2) |
| C2   | C3   | C4   | 121.8(3)   | C25  | C26  | C21  | 123.1(2) |
| N1   | C4   | C40  | 120.0(2)   | C28  | C27  | C15  | 120.4(2) |
| C3   | C4   | N1   | 120.7(2)   | C18  | C28  | C27  | 120.2(3) |

---

|     |     |     |          |     |     |     |          |
|-----|-----|-----|----------|-----|-----|-----|----------|
| C3  | C4  | C40 | 119.3(2) | C9  | C29 | C30 | 125.0(2) |
| C6  | C5  | N1  | 120.4(2) | C36 | C29 | C9  | 114.9(2) |
| C6  | C5  | C37 | 120.0(2) | C36 | C29 | C30 | 120.1(2) |
| C37 | C5  | N1  | 119.5(2) | C31 | C30 | C29 | 120.3(2) |
| C5  | C6  | C7  | 119.7(2) | C31 | C30 | C35 | 118.6(3) |
| C6  | C7  | C8  | 120.2(2) | C35 | C30 | C29 | 121.1(2) |
| C7  | C8  | C9  | 120.9(2) | C30 | C31 | C32 | 120.9(3) |
| C38 | C8  | C7  | 119.1(2) | C33 | C32 | C31 | 120.2(4) |
| C38 | C8  | C9  | 119.9(2) | C32 | C33 | C34 | 120.1(3) |
| N2  | C9  | C8  | 115.4(2) | C33 | C34 | C35 | 120.7(3) |
| N2  | C9  | C29 | 121.6(2) | C34 | C35 | C30 | 119.5(3) |
| C29 | C9  | C8  | 122.9(2) | N4  | C36 | C29 | 124.7(3) |
| N2  | C10 | N4  | 125.1(2) | C38 | C37 | C5  | 120.3(2) |
| N2  | C10 | C11 | 116.8(2) | C8  | C38 | C37 | 120.3(2) |
| N4  | C10 | C11 | 118.0(2) | C1  | C39 | C40 | 122.8(3) |
| C12 | C11 | C10 | 120.5(2) | C4  | C40 | C41 | 122.8(2) |
| C12 | C11 | C50 | 119.2(2) | C39 | C40 | C4  | 117.5(2) |
| C50 | C11 | C10 | 120.3(2) | C39 | C40 | C41 | 119.7(2) |
| C13 | C12 | C11 | 120.4(2) | C40 | C41 | C42 | 108.8(2) |
| C14 | C13 | C12 | 120.1(2) | C40 | C41 | C49 | 109.5(2) |
| C13 | C14 | N3  | 119.9(2) | C42 | C41 | C49 | 108.7(2) |
| C51 | C14 | N3  | 120.2(2) | C43 | C41 | C40 | 112.0(2) |
| C51 | C14 | C13 | 119.8(2) | C43 | C41 | C42 | 109.3(2) |
| C16 | C15 | N3  | 120.3(2) | C43 | C41 | C49 | 108.5(2) |
| C27 | C15 | N3  | 119.7(2) | C44 | C43 | C41 | 122.4(2) |
| C27 | C15 | C16 | 120.0(2) | C48 | C43 | C41 | 119.7(2) |
| C15 | C16 | C20 | 122.1(2) | C48 | C43 | C44 | 118.0(2) |
| C17 | C16 | C15 | 117.5(2) | C43 | C44 | N1  | 120.7(2) |
| C17 | C16 | C20 | 120.2(2) | C45 | C44 | N1  | 120.1(2) |

---



|     |     |     |            |     |     |     |          |
|-----|-----|-----|------------|-----|-----|-----|----------|
| C18 | C17 | C16 | 122.6(2)   | C45 | C44 | C43 | 119.3(2) |
| C28 | C18 | C17 | 119.2(2)   | C46 | C45 | C44 | 120.6(3) |
| C16 | C20 | C19 | 108.5(2)   | C47 | C46 | C45 | 120.6(3) |
| C16 | C20 | C21 | 110.49(19) | C48 | C47 | C46 | 118.7(3) |
| C16 | C20 | C52 | 110.4(2)   | C47 | C48 | C43 | 122.9(3) |
| C19 | C20 | C52 | 108.6(2)   | C51 | C50 | C11 | 120.1(2) |
| C21 | C20 | C19 | 109.5(2)   | C14 | C51 | C50 | 120.3(2) |

## 8. NMR Spectra

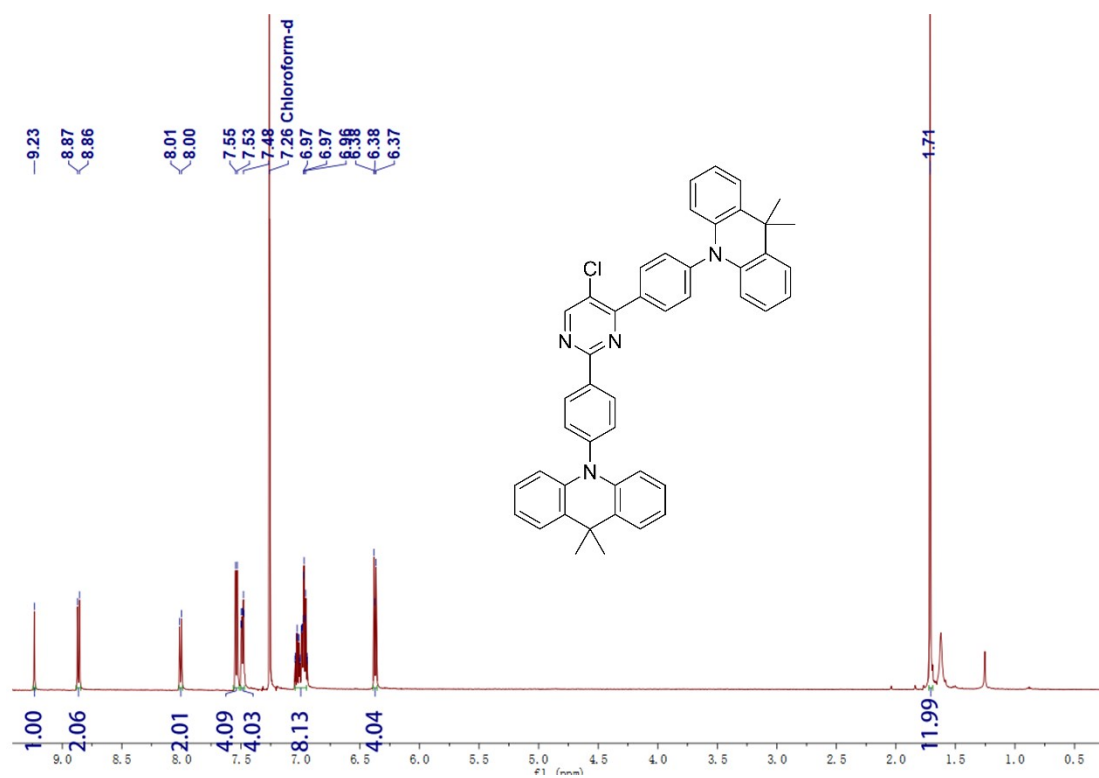

**Figure S11.** <sup>1</sup>H-NMR spectrum of Cl-Pym-DMAC (500 MHz, CDCl<sub>3</sub>).

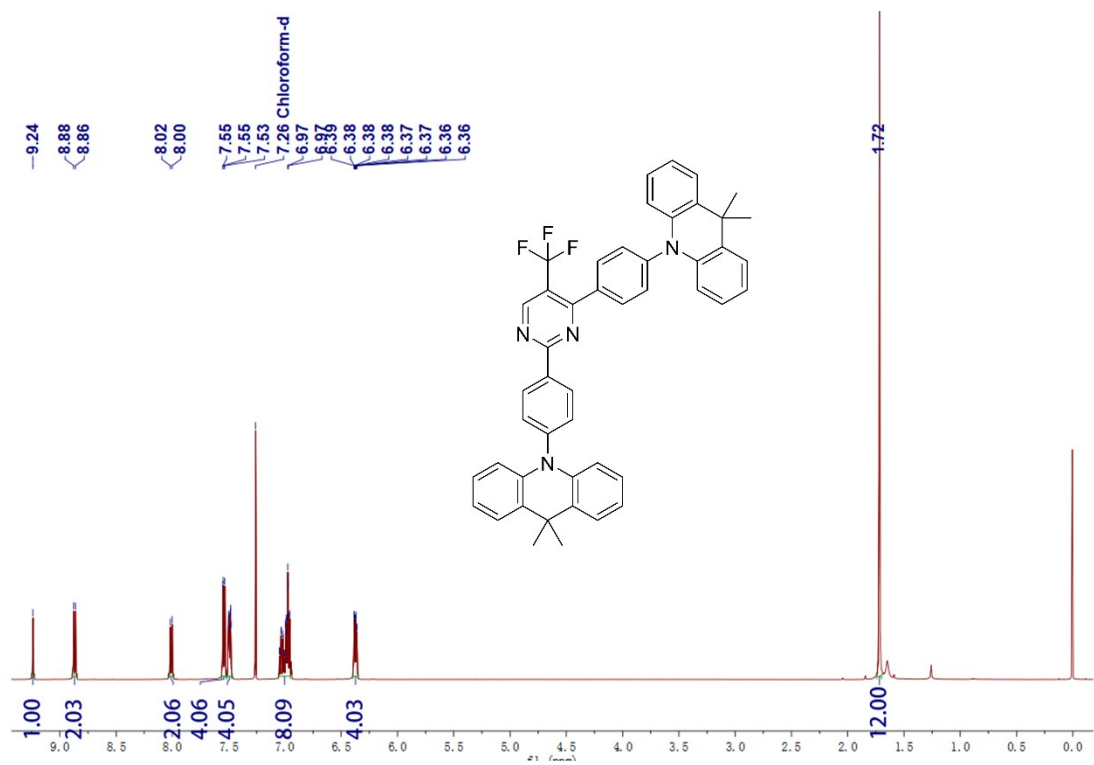

Figure S12. <sup>1</sup>H-NMR spectrum of CF<sub>3</sub>-Pym-DMAC (500 MHz, CDCl<sub>3</sub>).

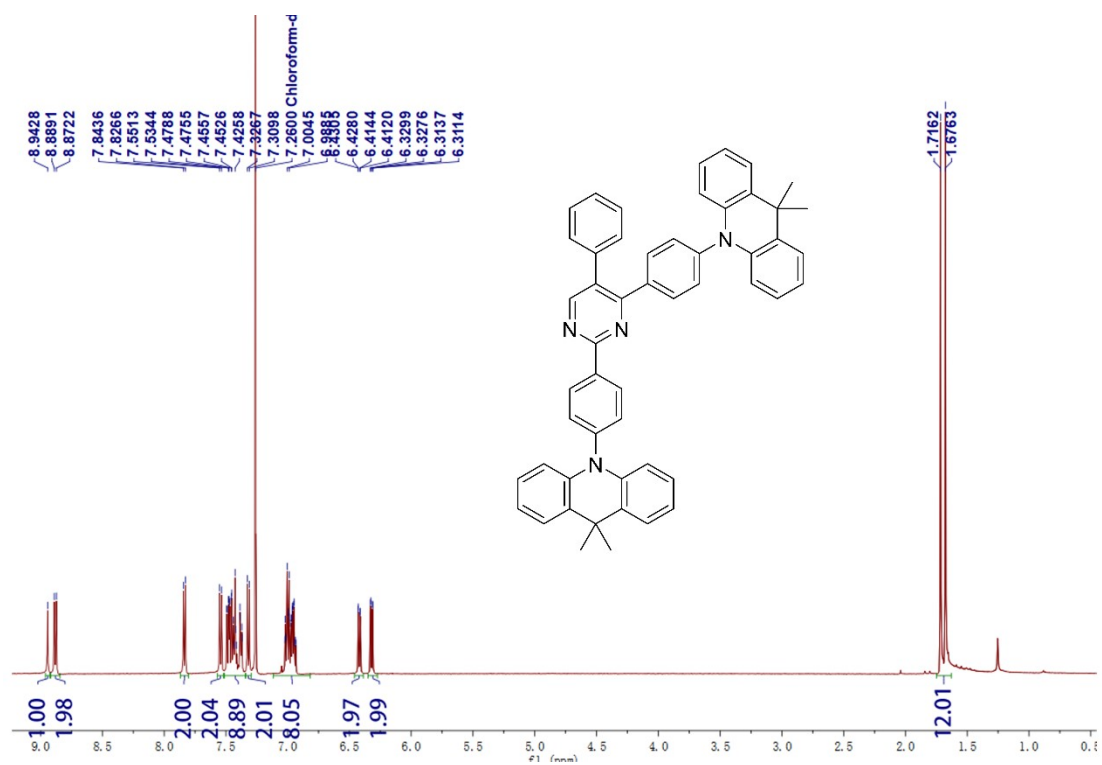

Figure S13. <sup>1</sup>H-NMR spectrum of Ph-Pym-DMAC (500 MHz, CDCl<sub>3</sub>).

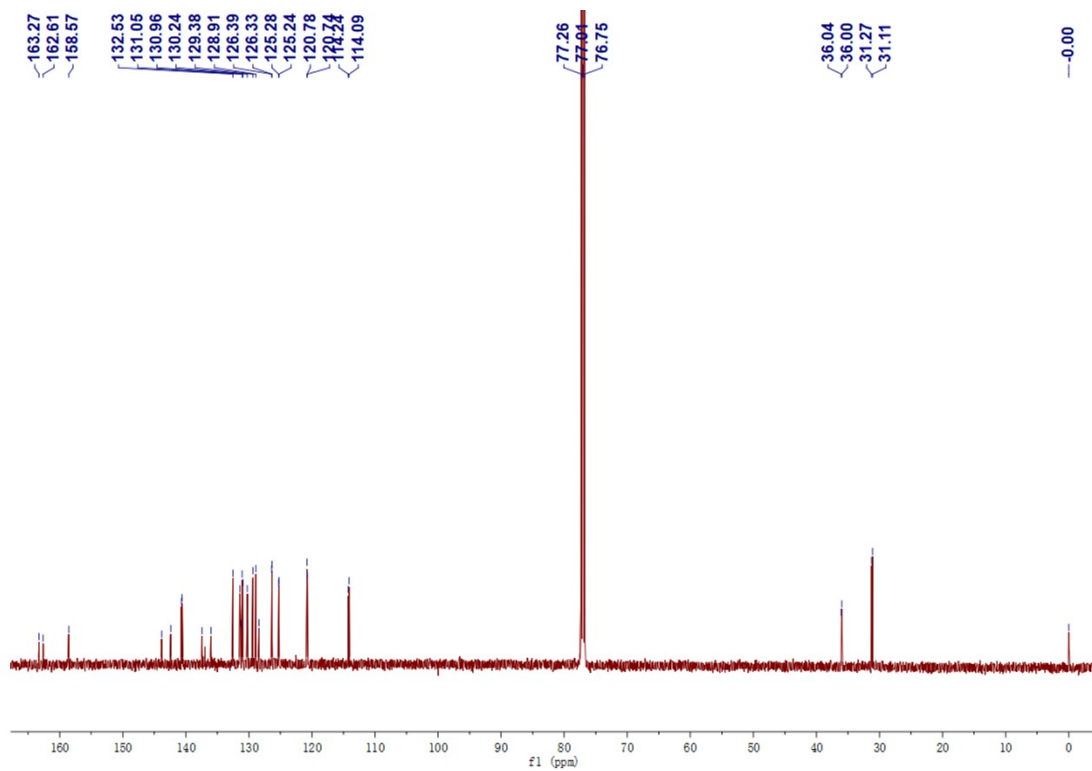

**Figure S14.**  $^{13}\text{C}$ -NMR spectrum of Ph-Pym-DMAC (126 MHz,  $\text{CDCl}_3$ ).

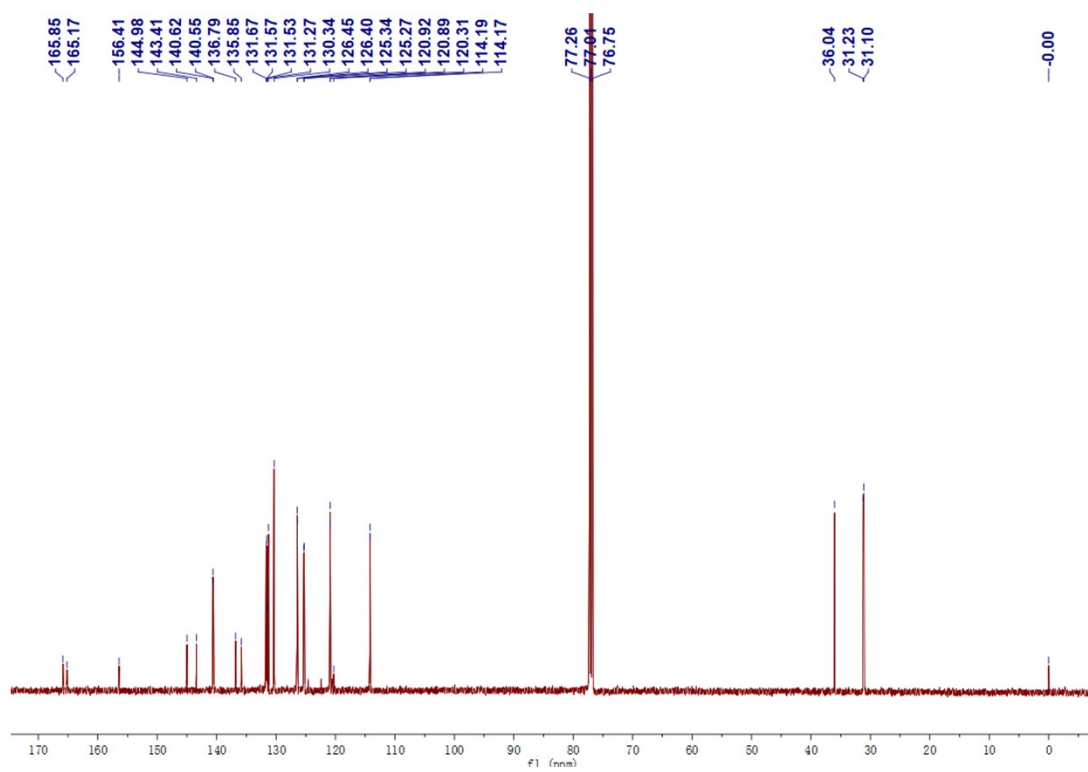

**Figure S15.**  $^{13}\text{C}$ -NMR spectrum of  $\text{CF}_3$ -Pym-DMAC (126 MHz,  $\text{CDCl}_3$ ).

## 9. Mass Spectra

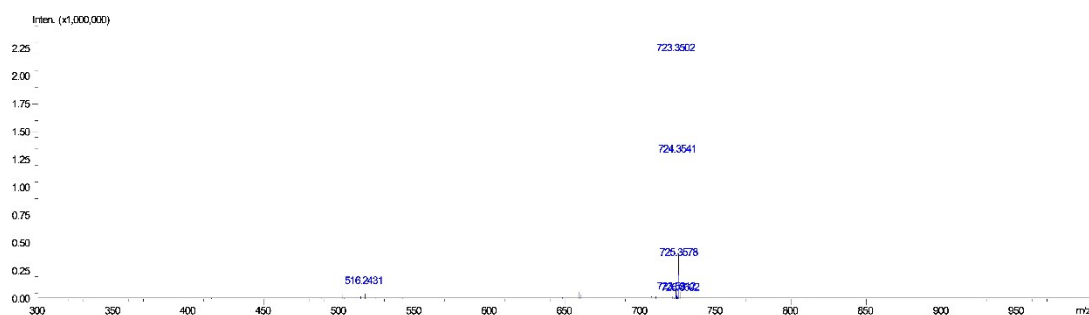

**Figure S16.** Mass spectrum of Ph-Pym-DMAC.

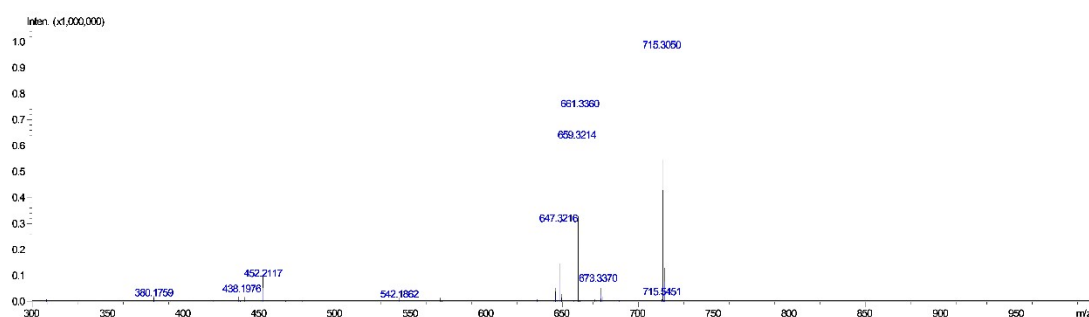

**Figure S17.** Mass spectrum of CF<sub>3</sub>-Pym-DMAC.

## 10. References

1. X. L. Chen, X. D. Tao, Y. S. Wang, Z. Z. Wei, L. Y. Meng, D. H. Zhang, F. L. Lin and C. Z. Lu, *CCS Chem.*, 2022, **3**, 1-22.
2. W. T. Wu, C. H. Cheng, W. H. Wu, H. M. Guo, S. M. Ji, P. Song, K. L. Han, J. Z. Zhao, X. Zhang, Y. B. Wu and G. T. Du, *Eur. J. Inorg. Chem.* 2010, 2010, 4683-4696.
3. X. L. Chen, X. D. Tao, Z. Wei, L. Meng, F. L. Lin, D. H. Zhang, Y. Y. Jing and C. Z. Lu, *ACS Appl. Mater. Interfaces*, 2021, **13**, 46909-46918.
4. I. S. Park, H. Komiyama and T. Yasuda, *Chem. Sci.*, 2017, **8**, 953-960.
5. P. Ganesan, R. Ranganathan, Y. Chi, X. K. Liu, C. S. Lee, S. H. Liu, G. H. Lee, T. C. Lin, Y. T. Chen and P. T. Chou, *Chem. Eur. J.*, 2017, **23**, 2858-2866.
6. H. J. Park, S. H. Han, J. Y. Lee, H. Han and E. G. Kim, *Chem. Mater.*, 2018, **30**, 3215-3222.

7. C. H. Lee, S. H. Choi, S. J. Oh, J. H. Lee, J. W. Shim, C. Adachi and S. Y. Lee, *RSC Adv.*, 2020, 10, 42897-42902.
8. T. Serevicius, R. Skaisgiris, I. Fiodorova, G. Kreiza, D. Banevicius, K. Kazlauskas, S. Tumkevicius and S. Jursenas, *J. Mater. Chem. C*, 2021, 9, 836-841.
9. Q. Zhang, S. Q. Sun, W. J. Chung, S. J. Yoon, Y. X. Wang, R. D. Guo, S. F. Ye, J. Y. Lee and L. Wang, *J. Mater. Chem. C*, 2019, 7, 12248-12255.
